# Supplementary material for: Development of highly stereoselective GalN3 donors and their application in the chemical synthesis of precursors of Tn antigen
Source: Royal Society of Chemistry journal article supplement (doi:10.1039/c1ob05893b), 2011-01-01

Compound 5 proton.esp

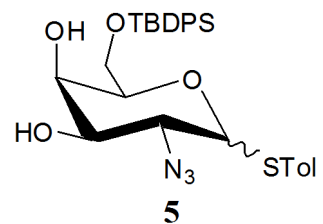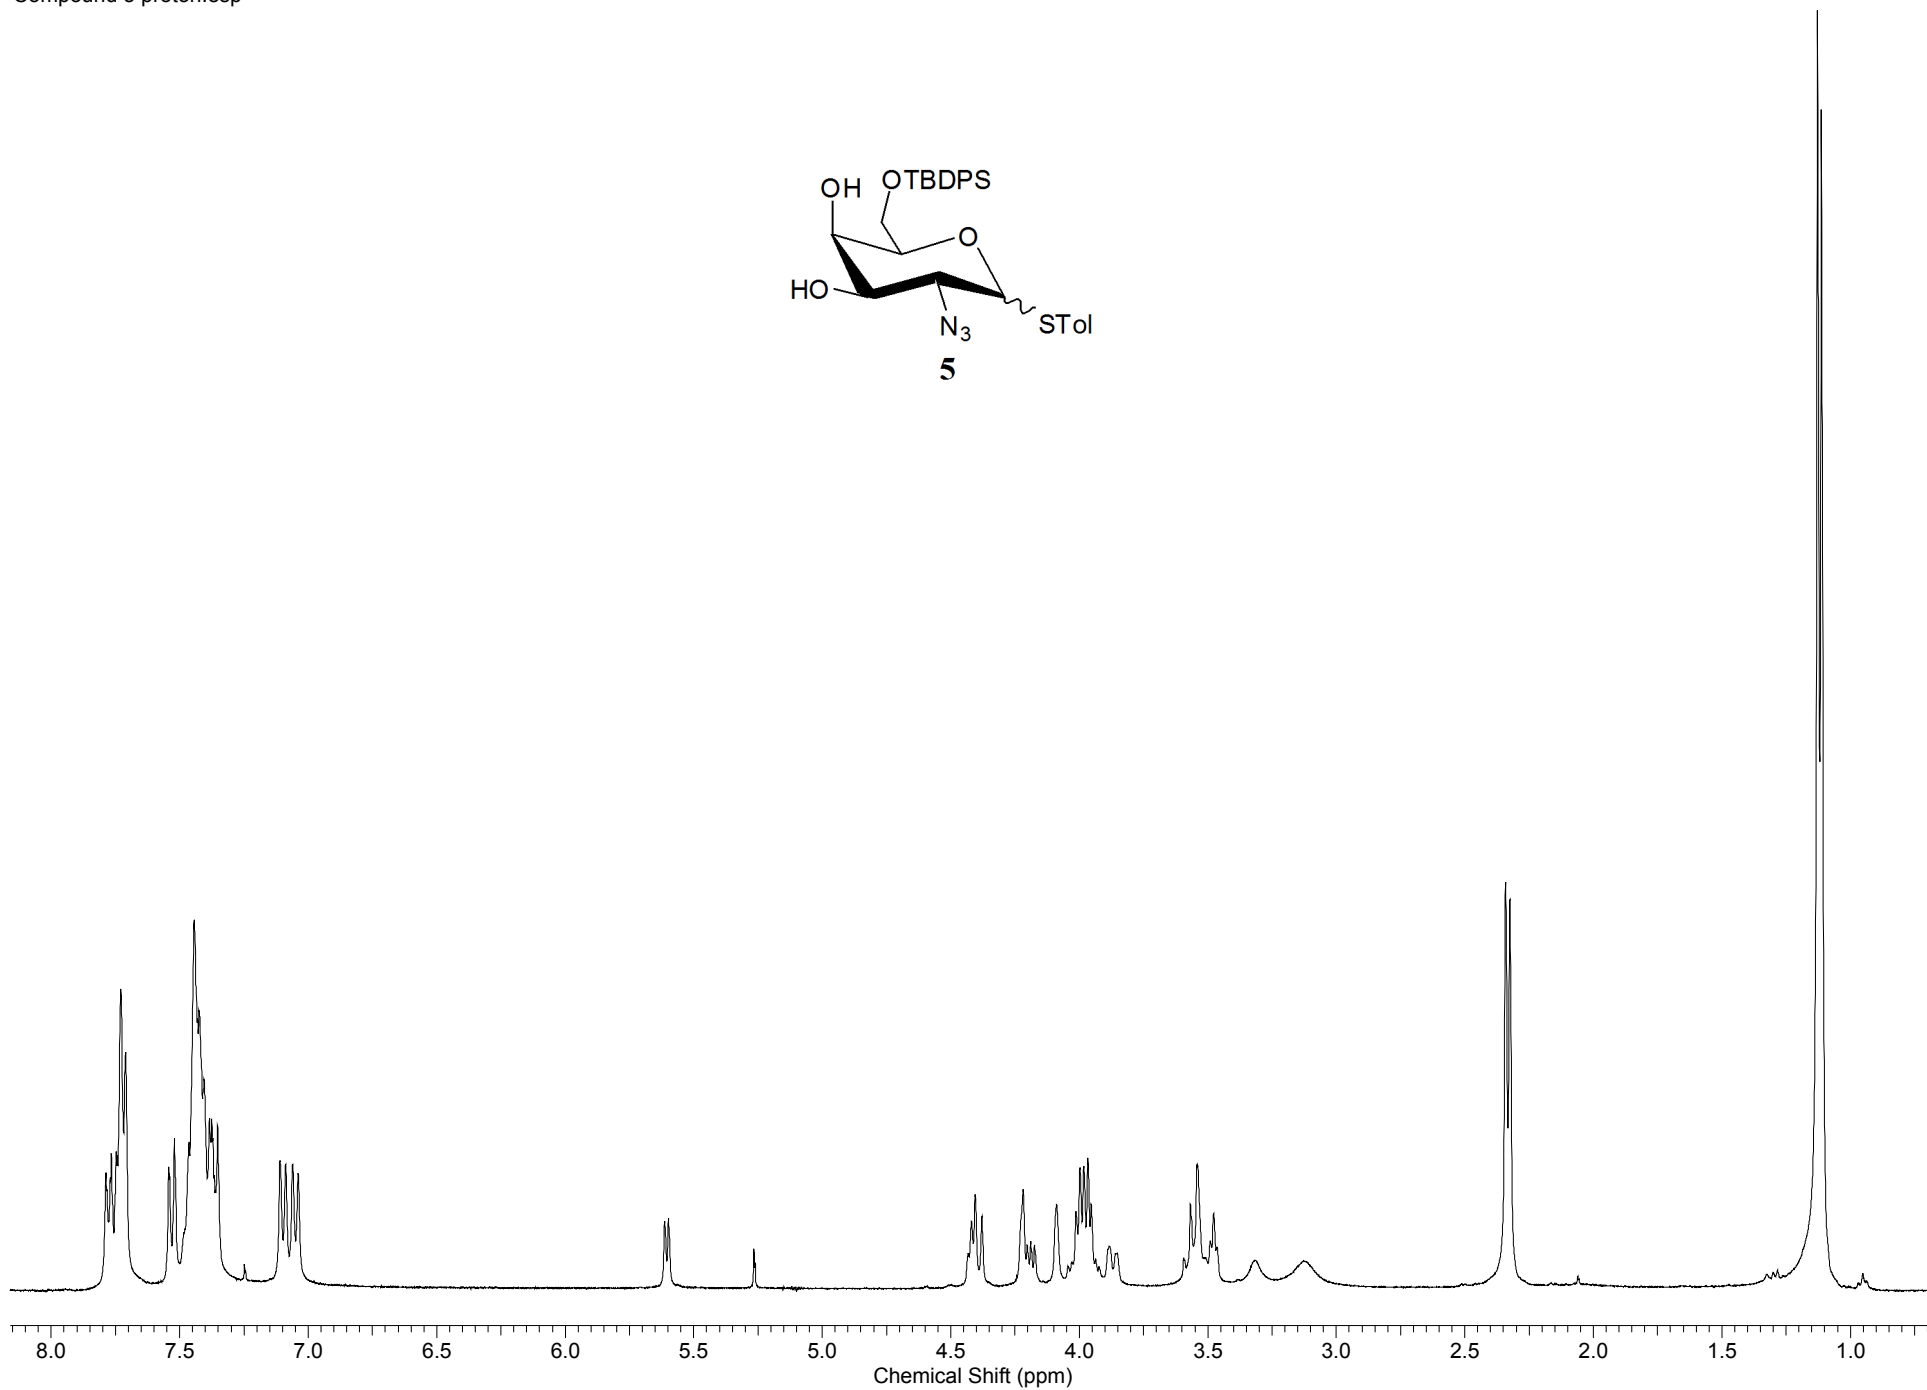

Compound 5 Carbon.esp

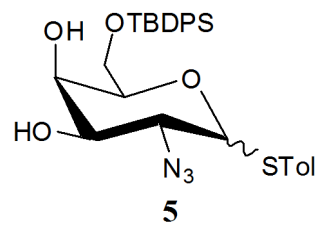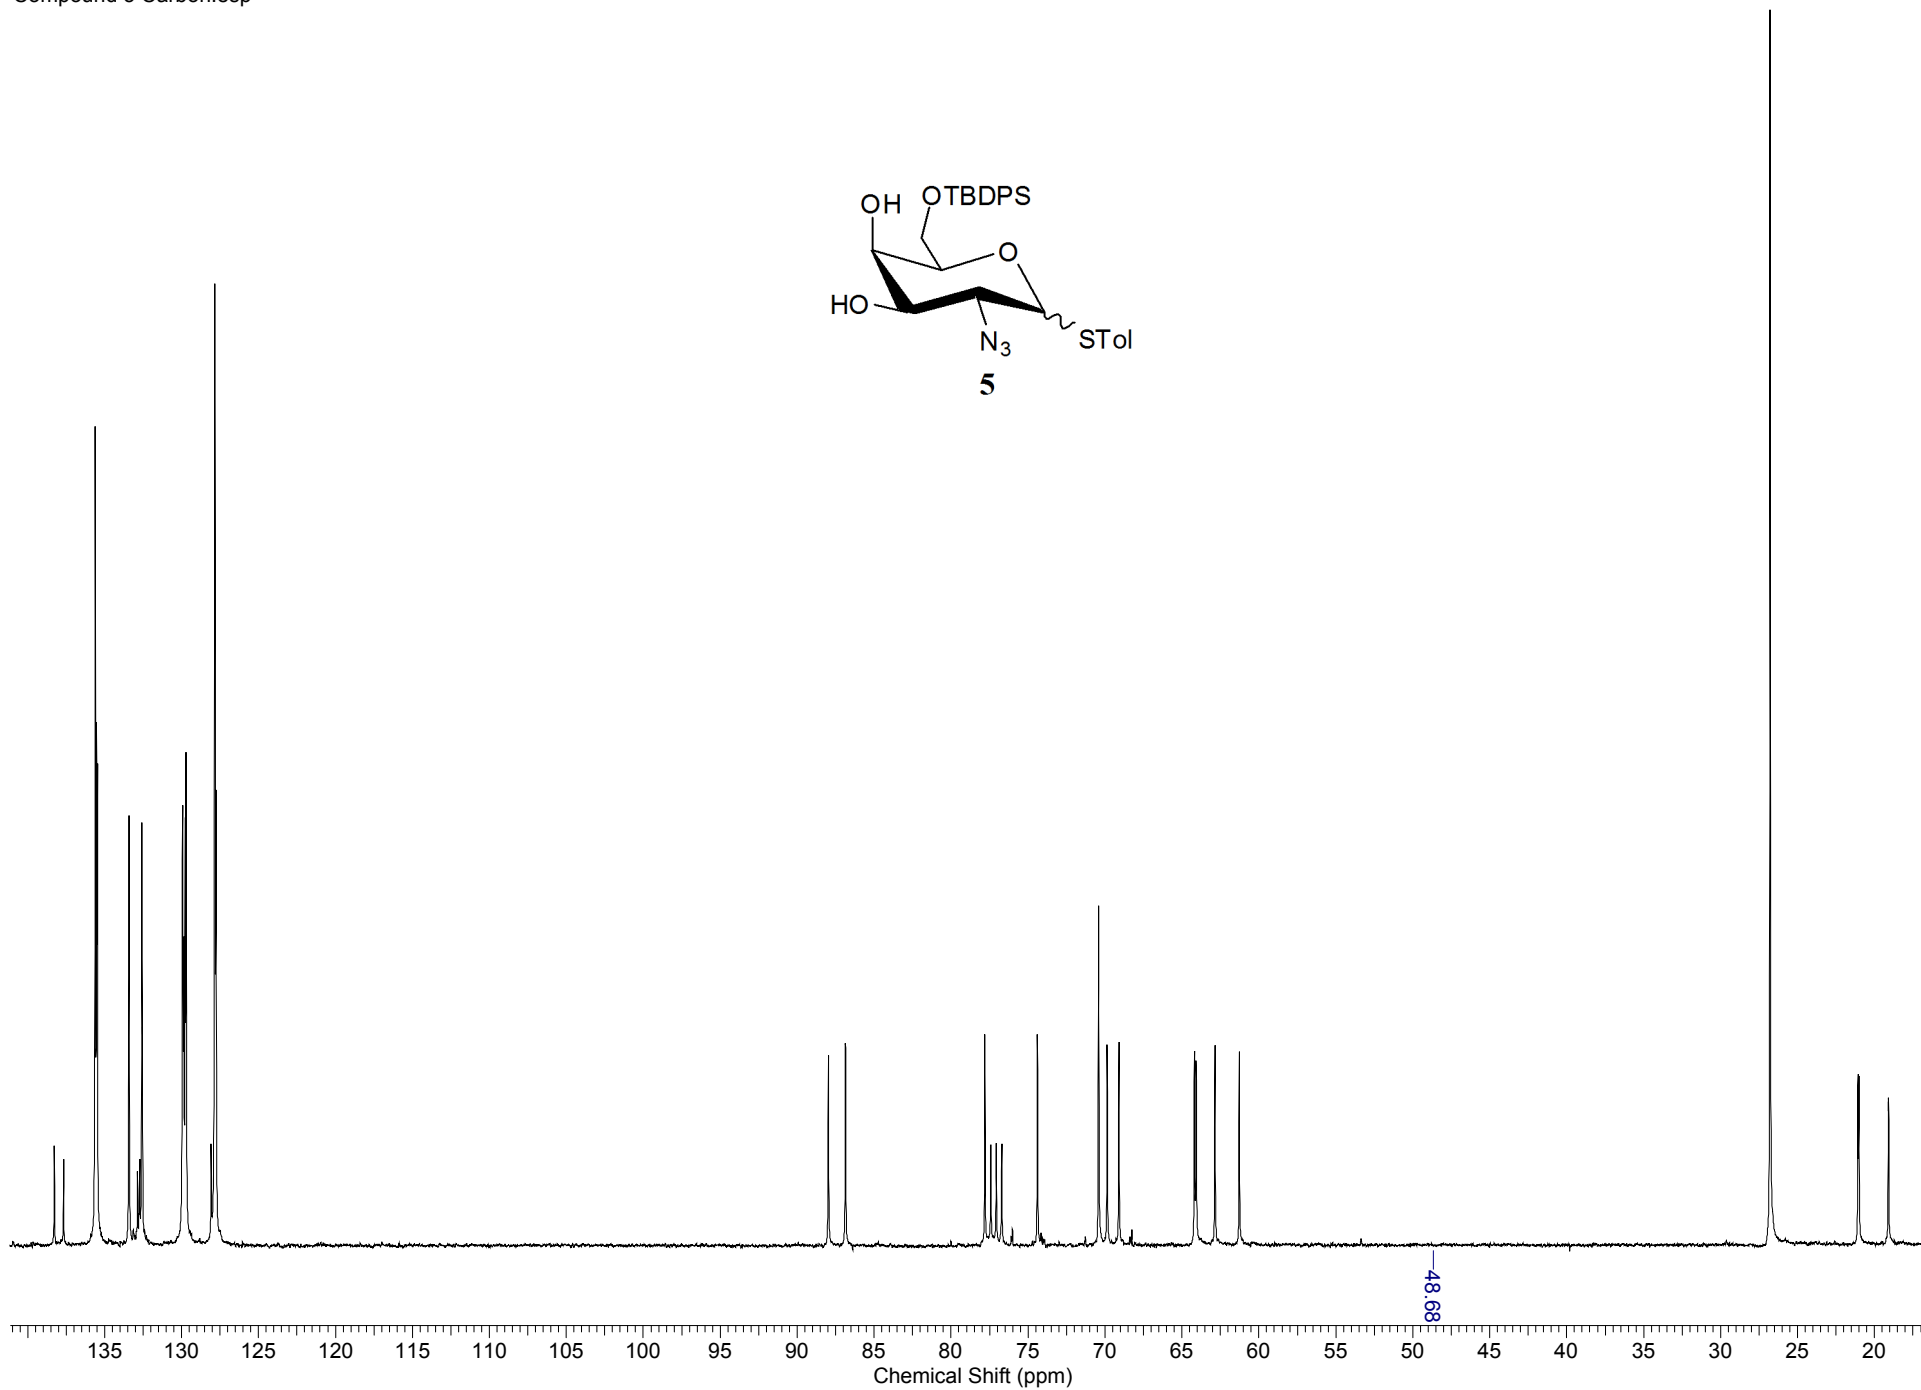

Compound 1a proton.esp

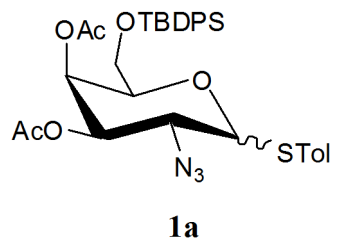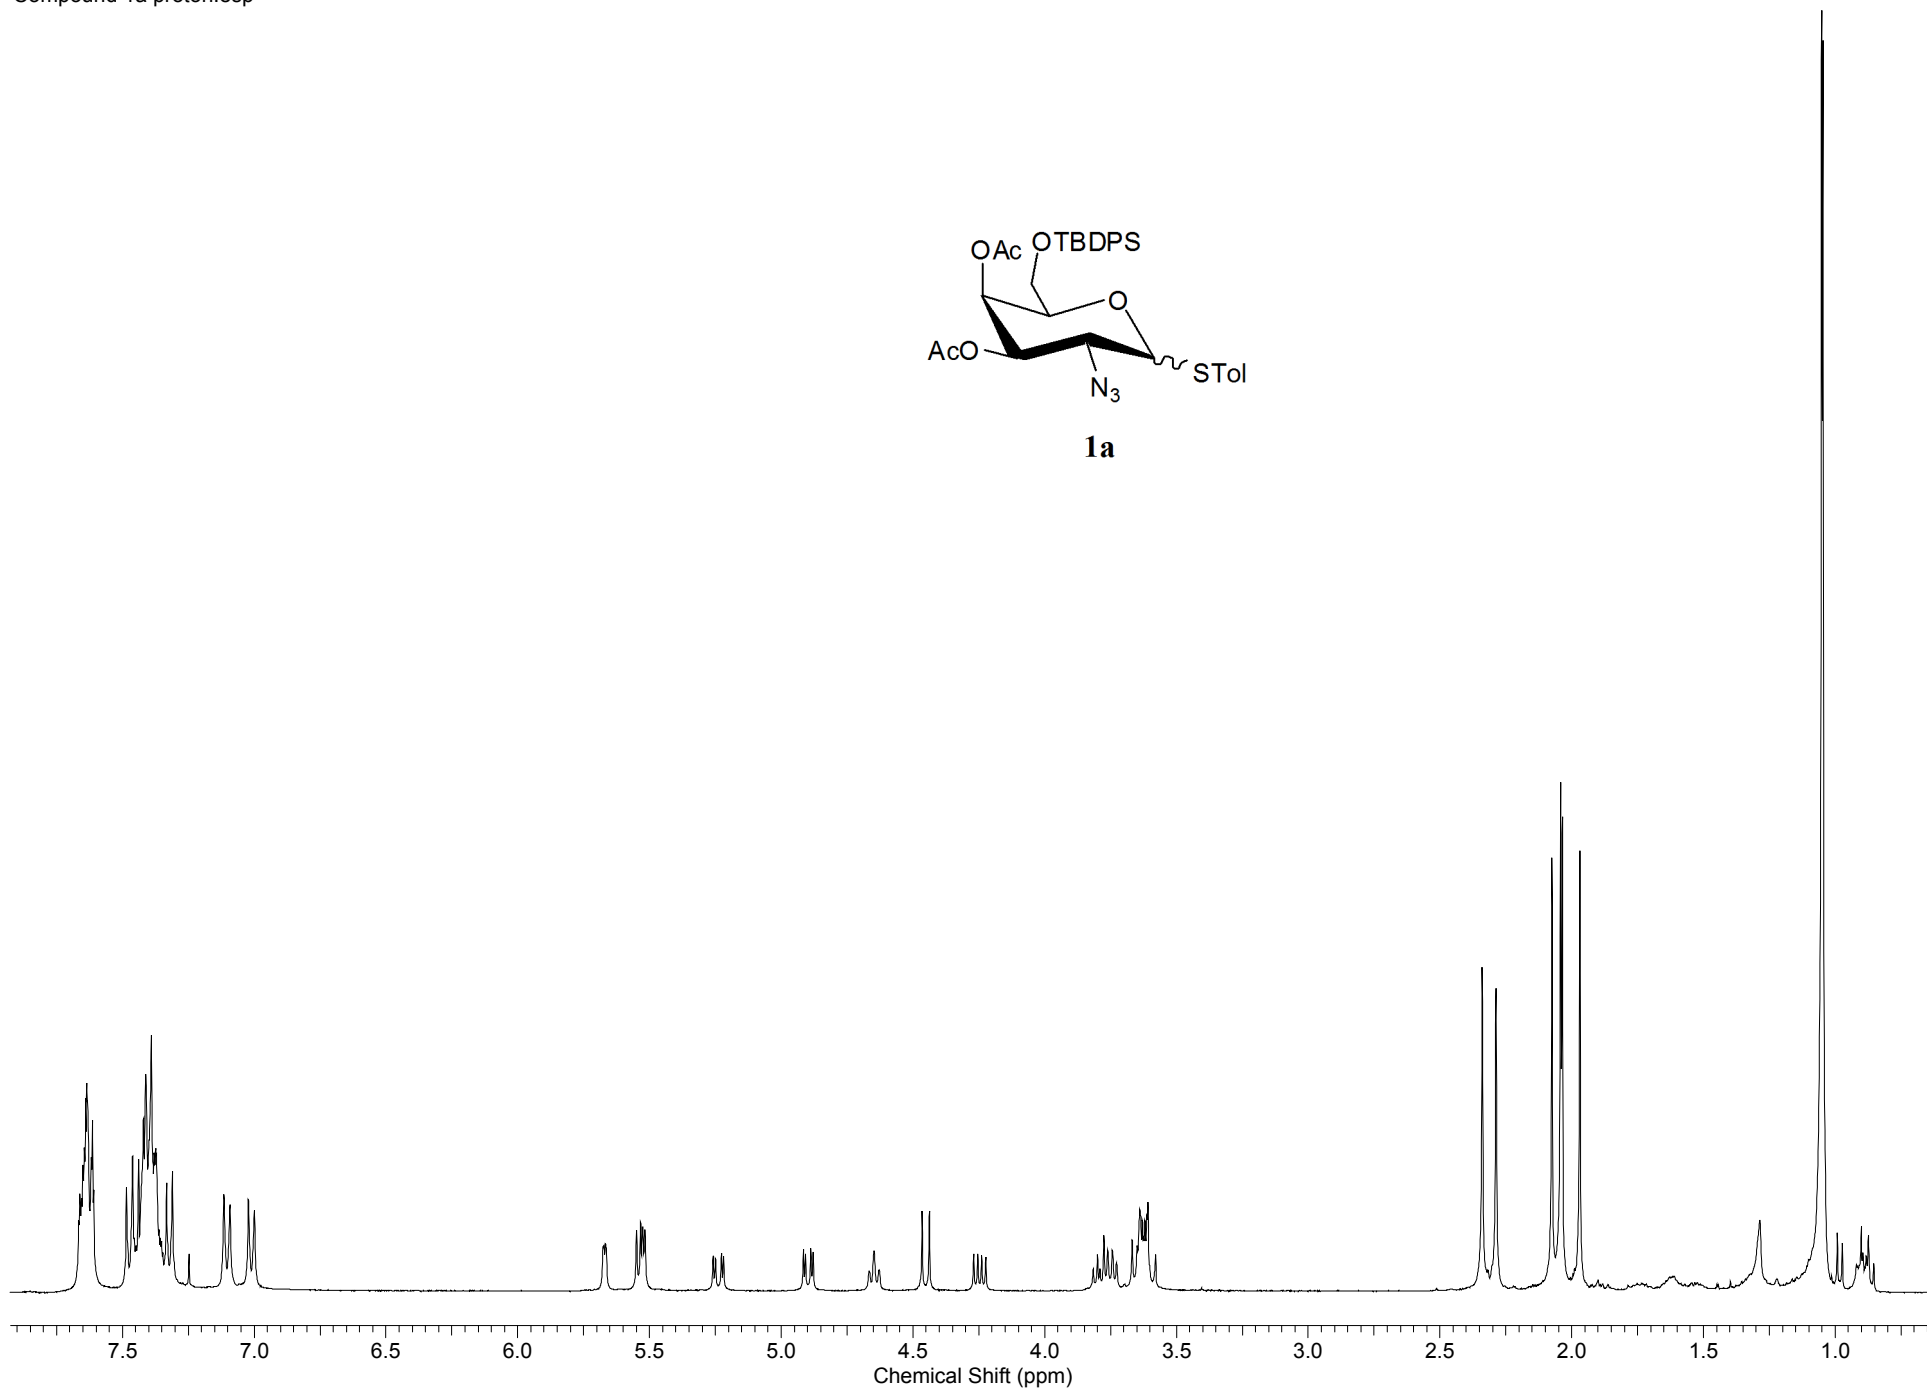

Compound 1a Carbon.esp

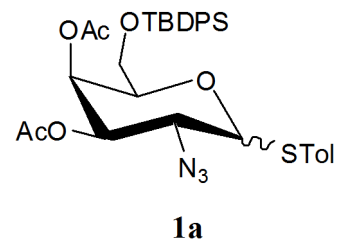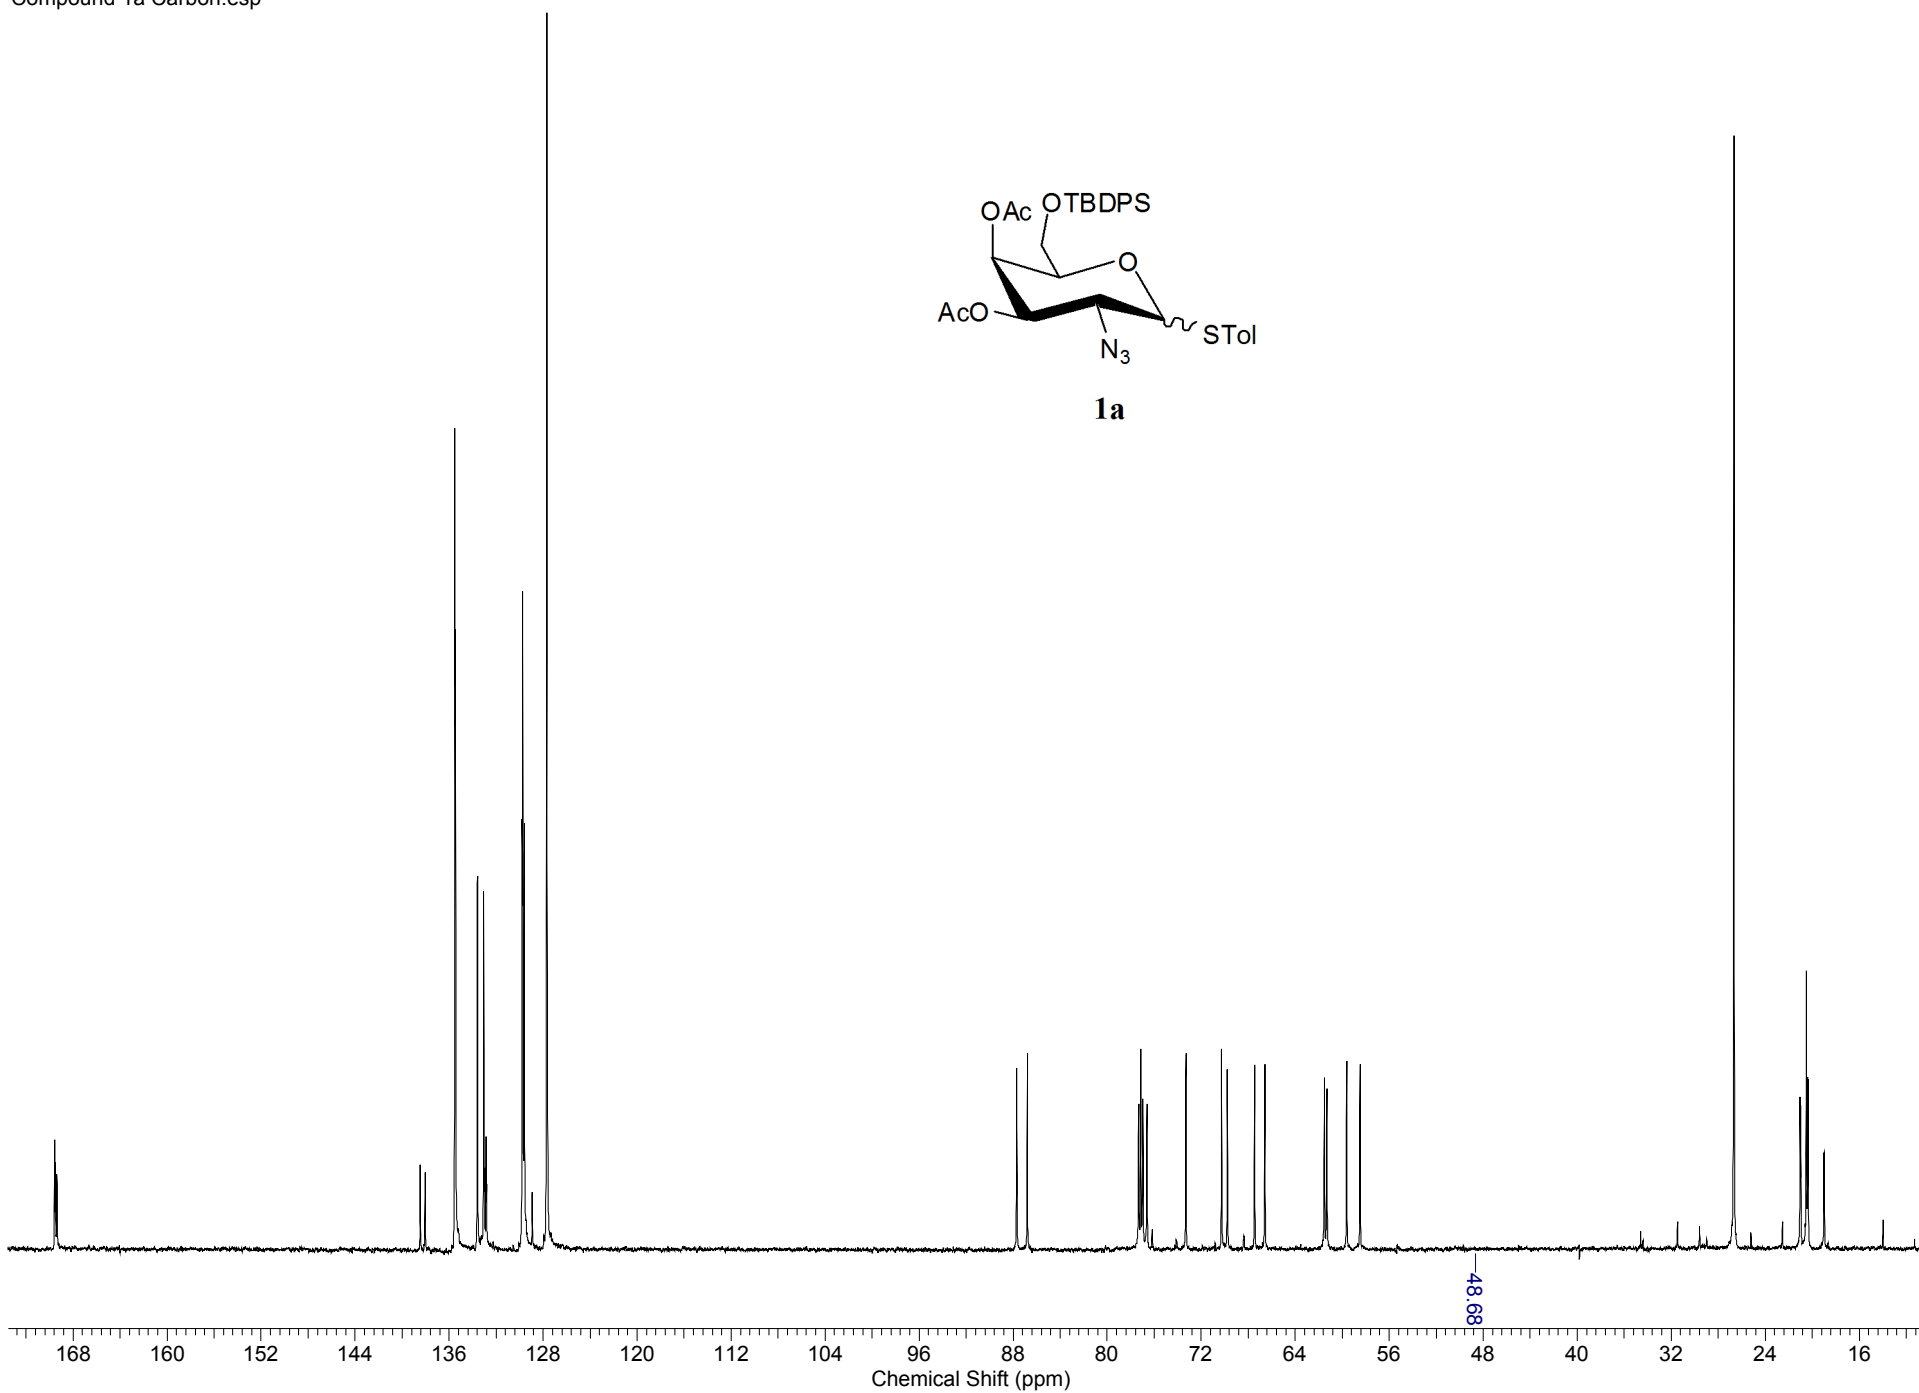

Compound 1b proton.esp

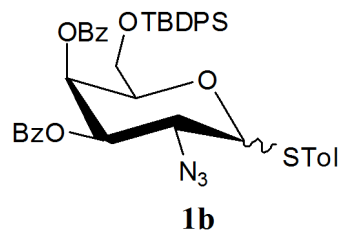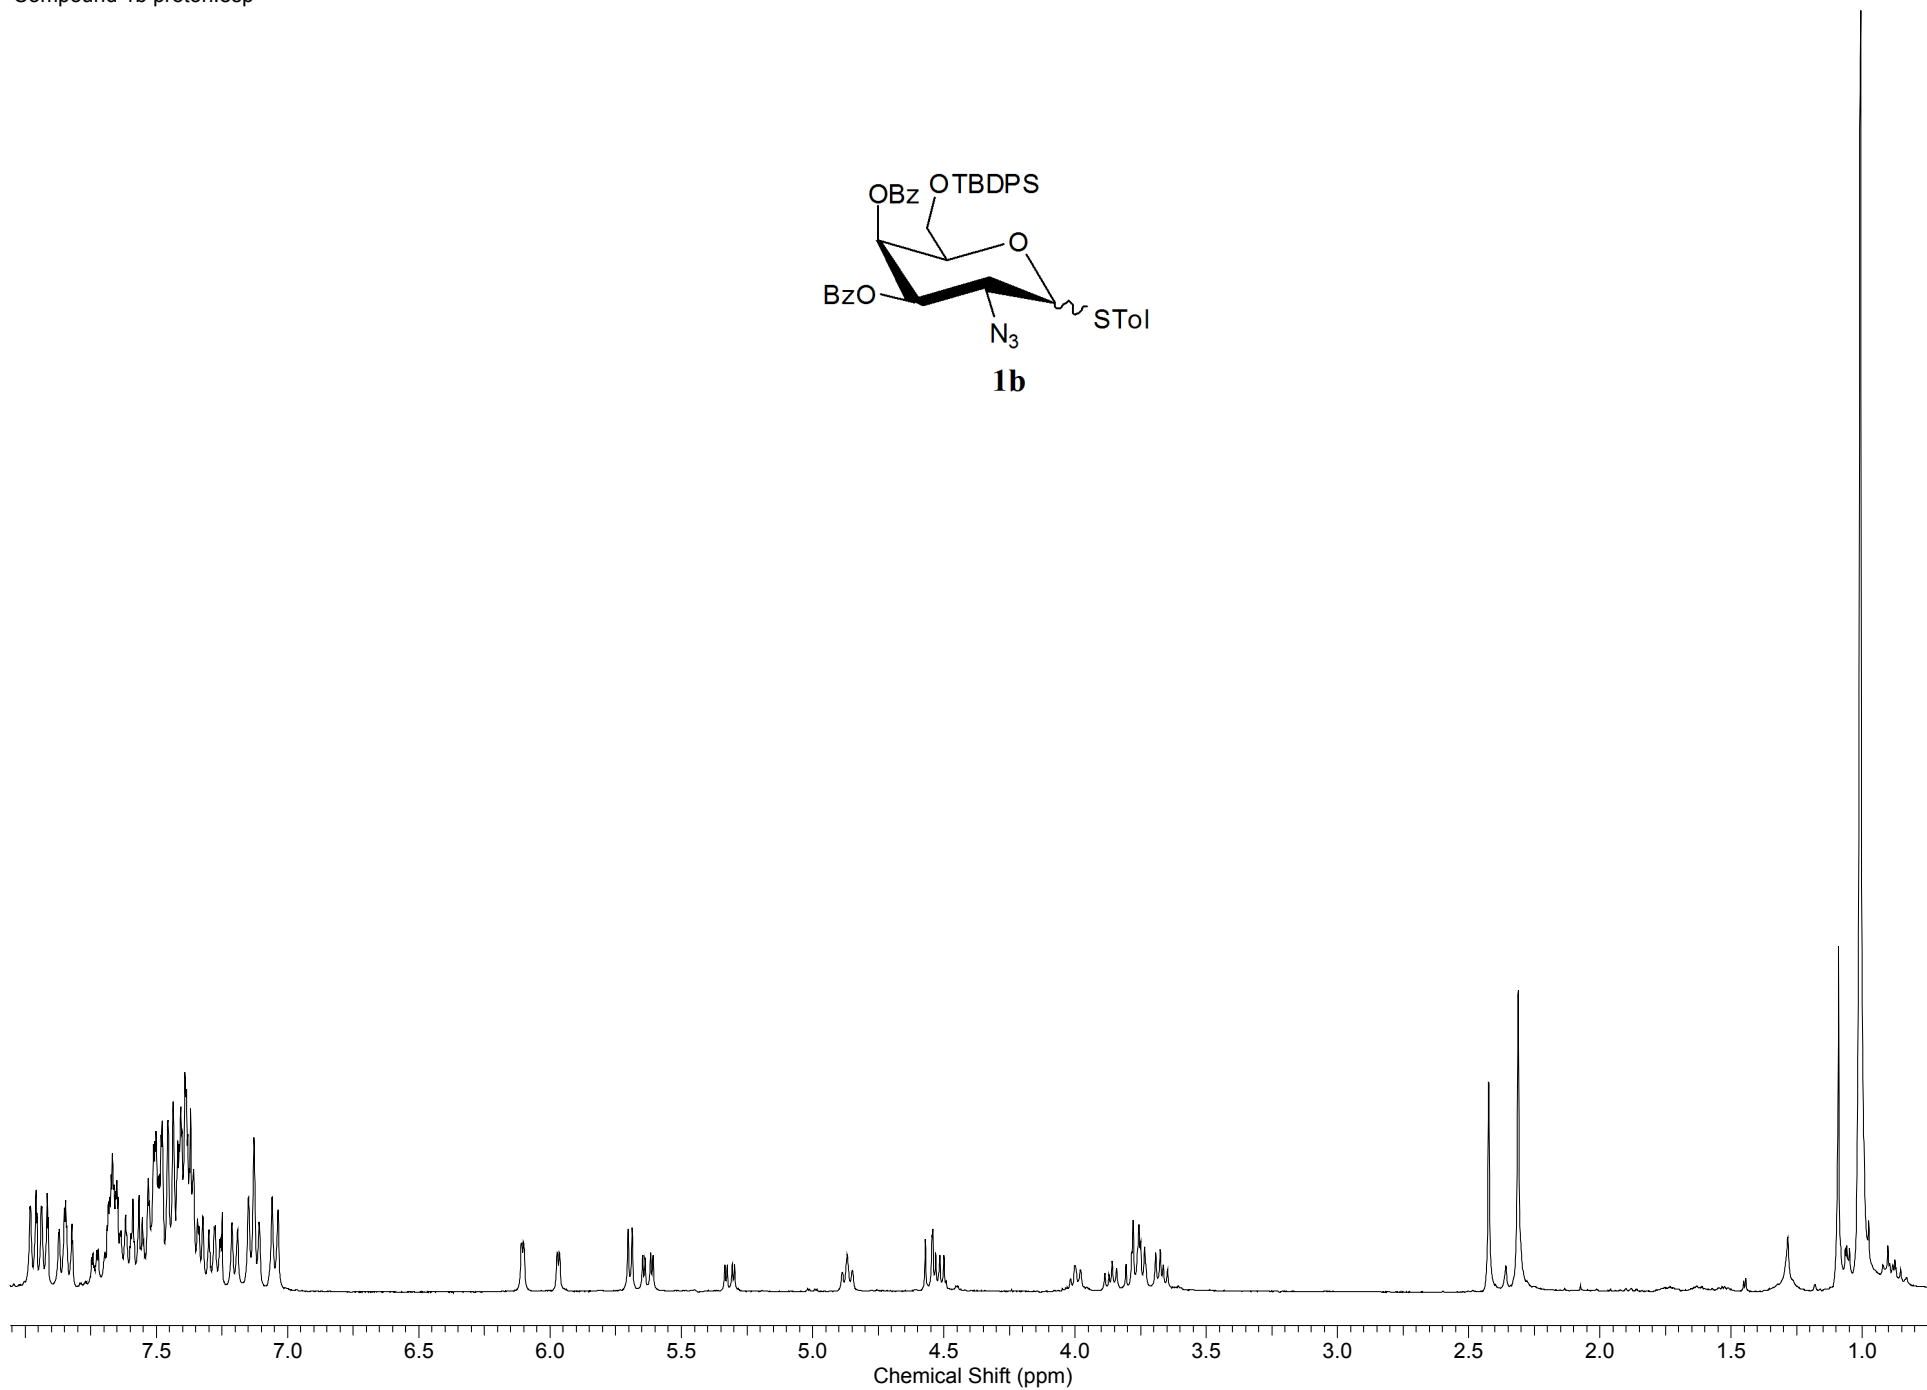

Compound 1b carbon.esp

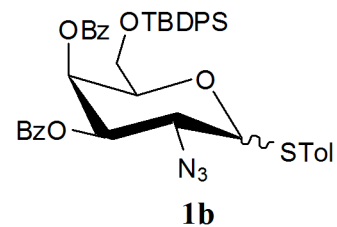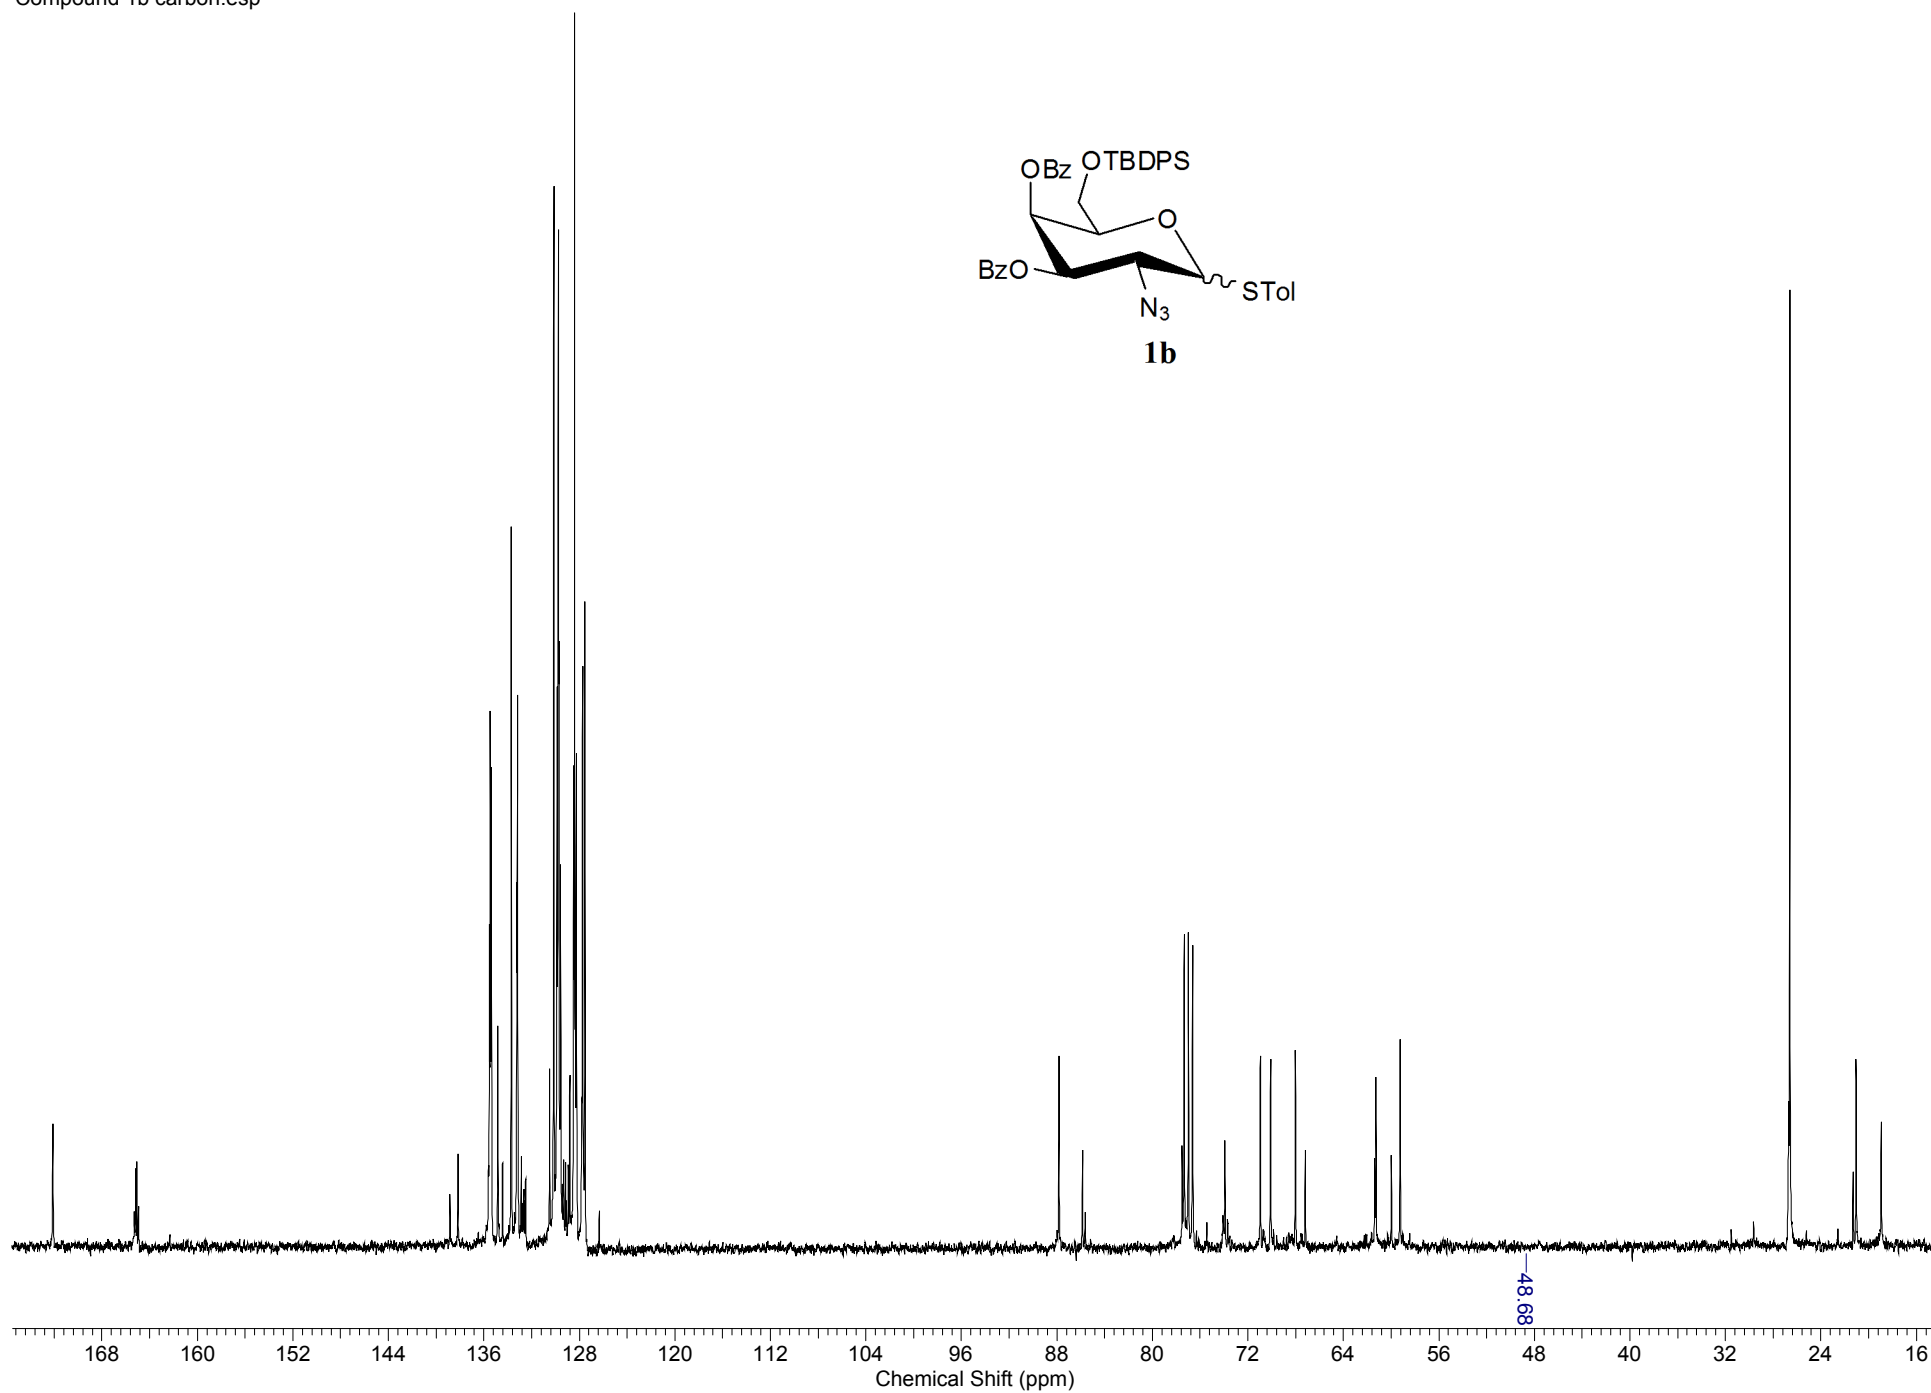

Compound 7 proton.esp

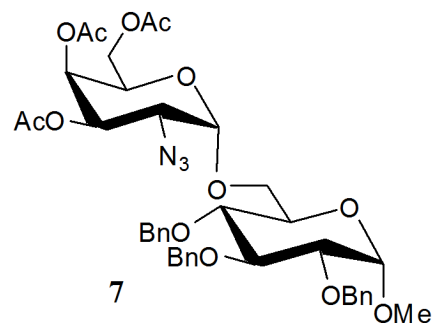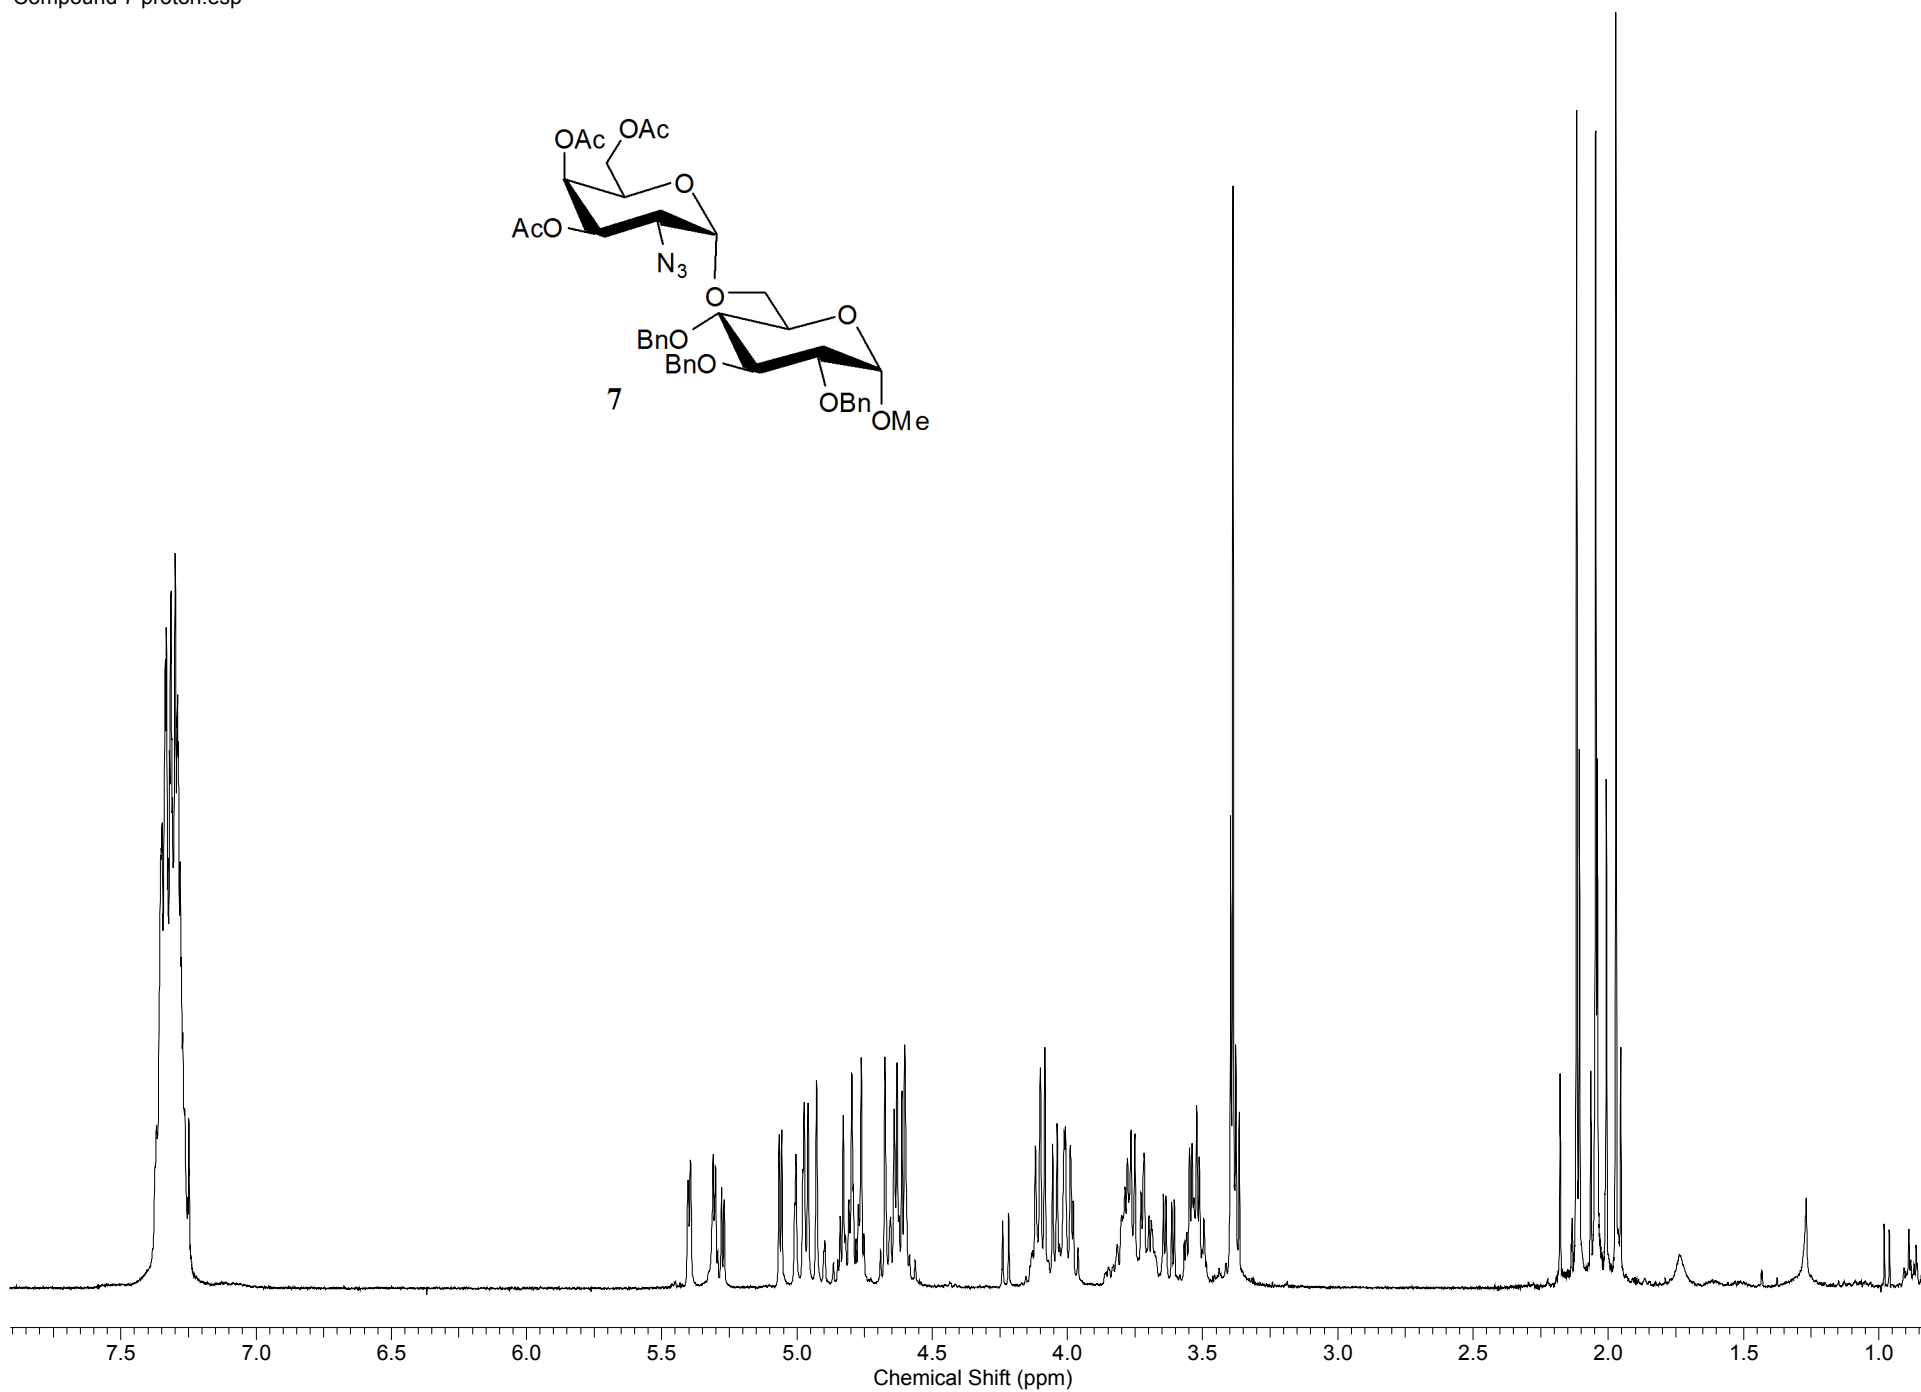

Compound 7 Carbon.esp

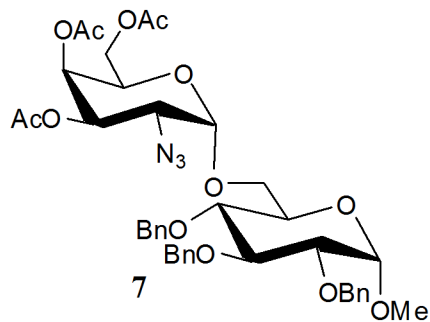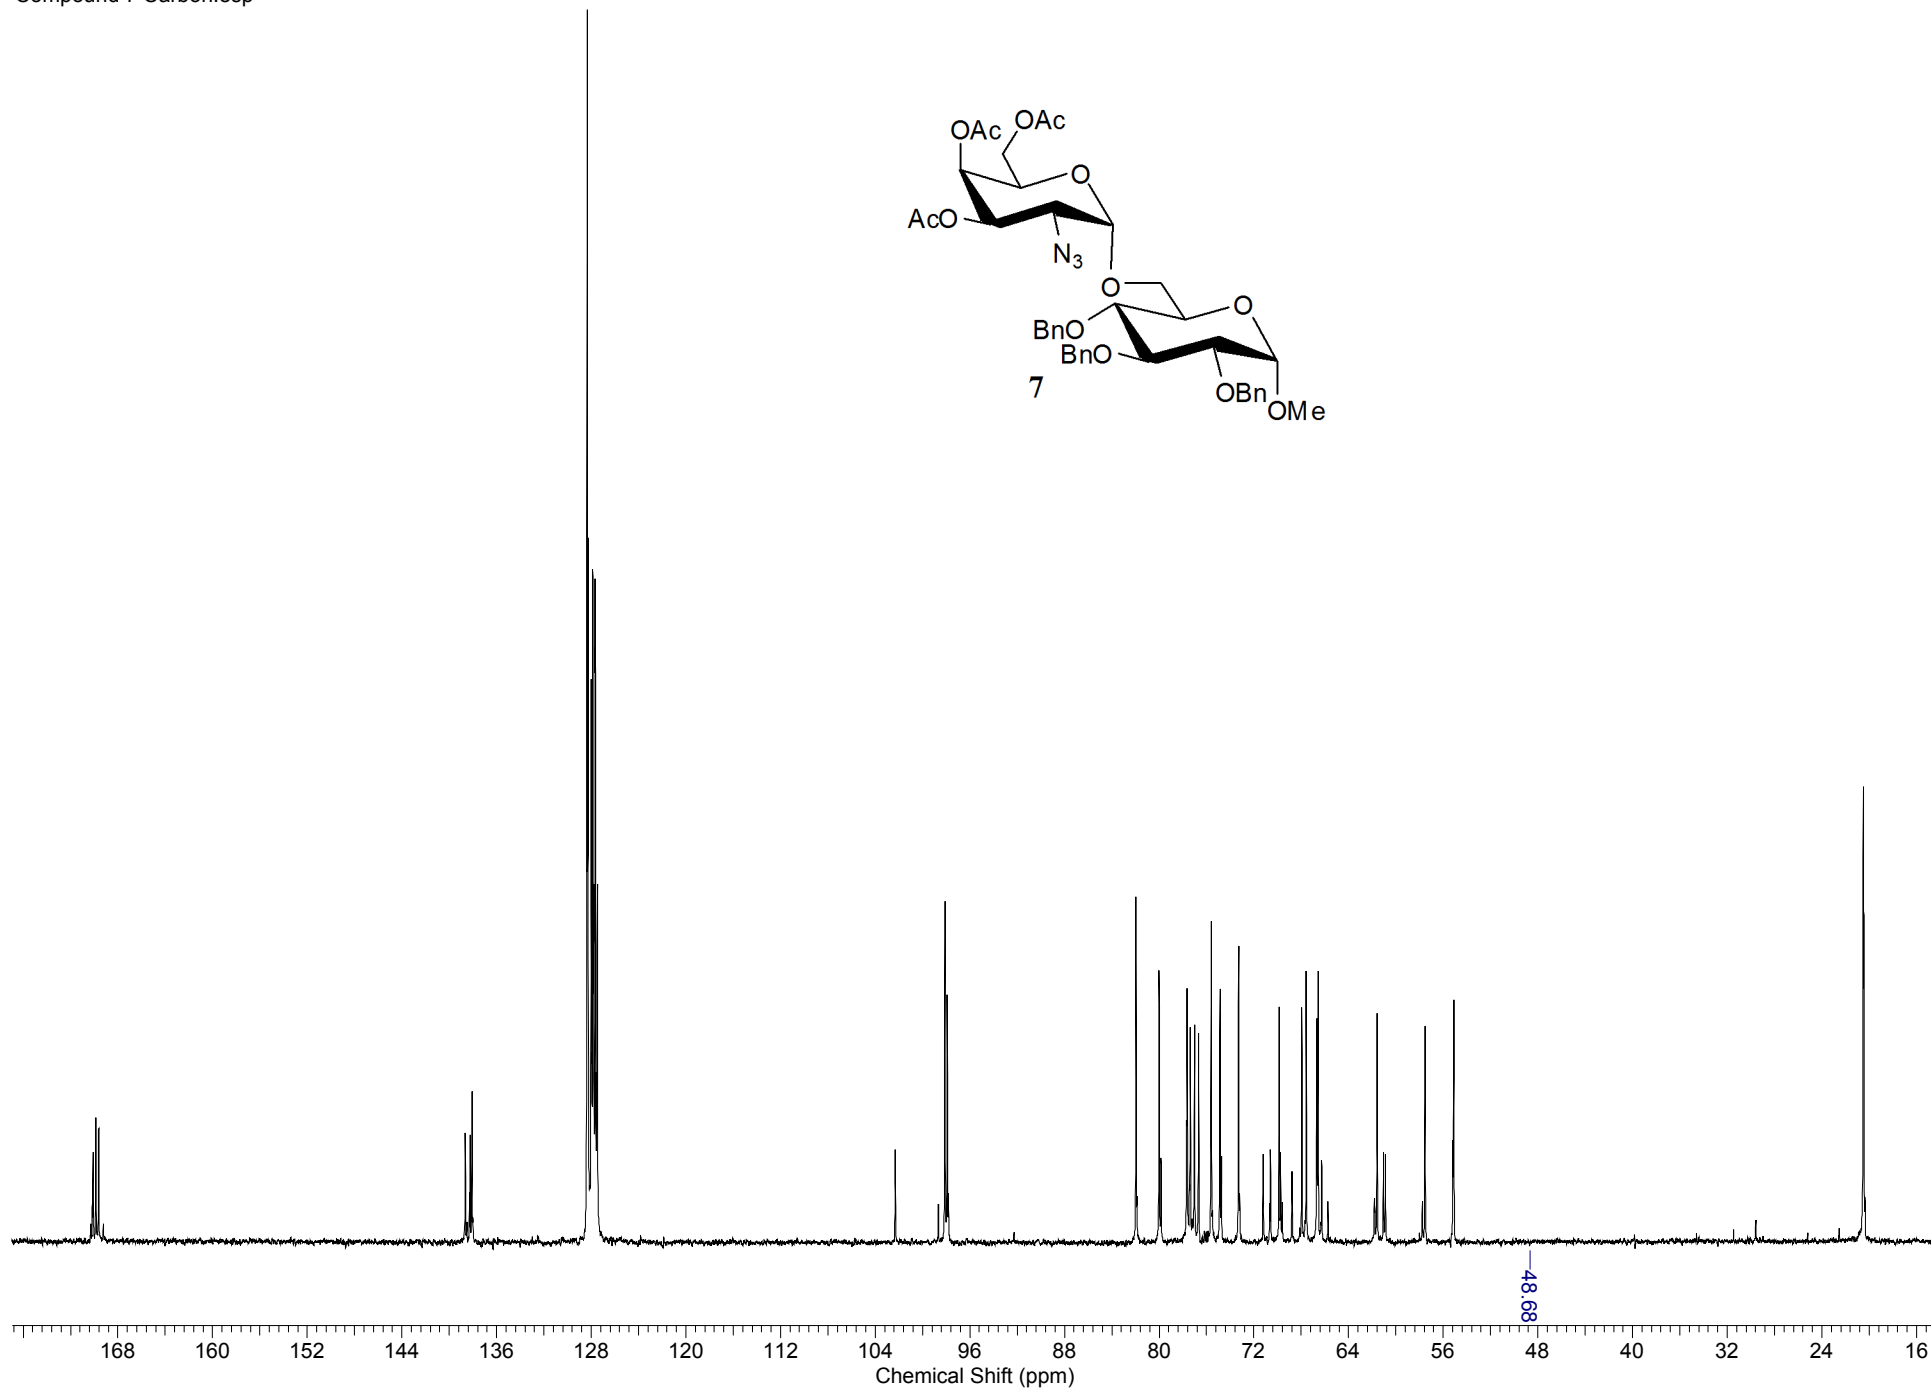



Compound 8 proton.esp

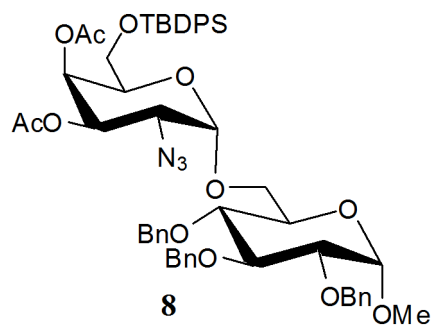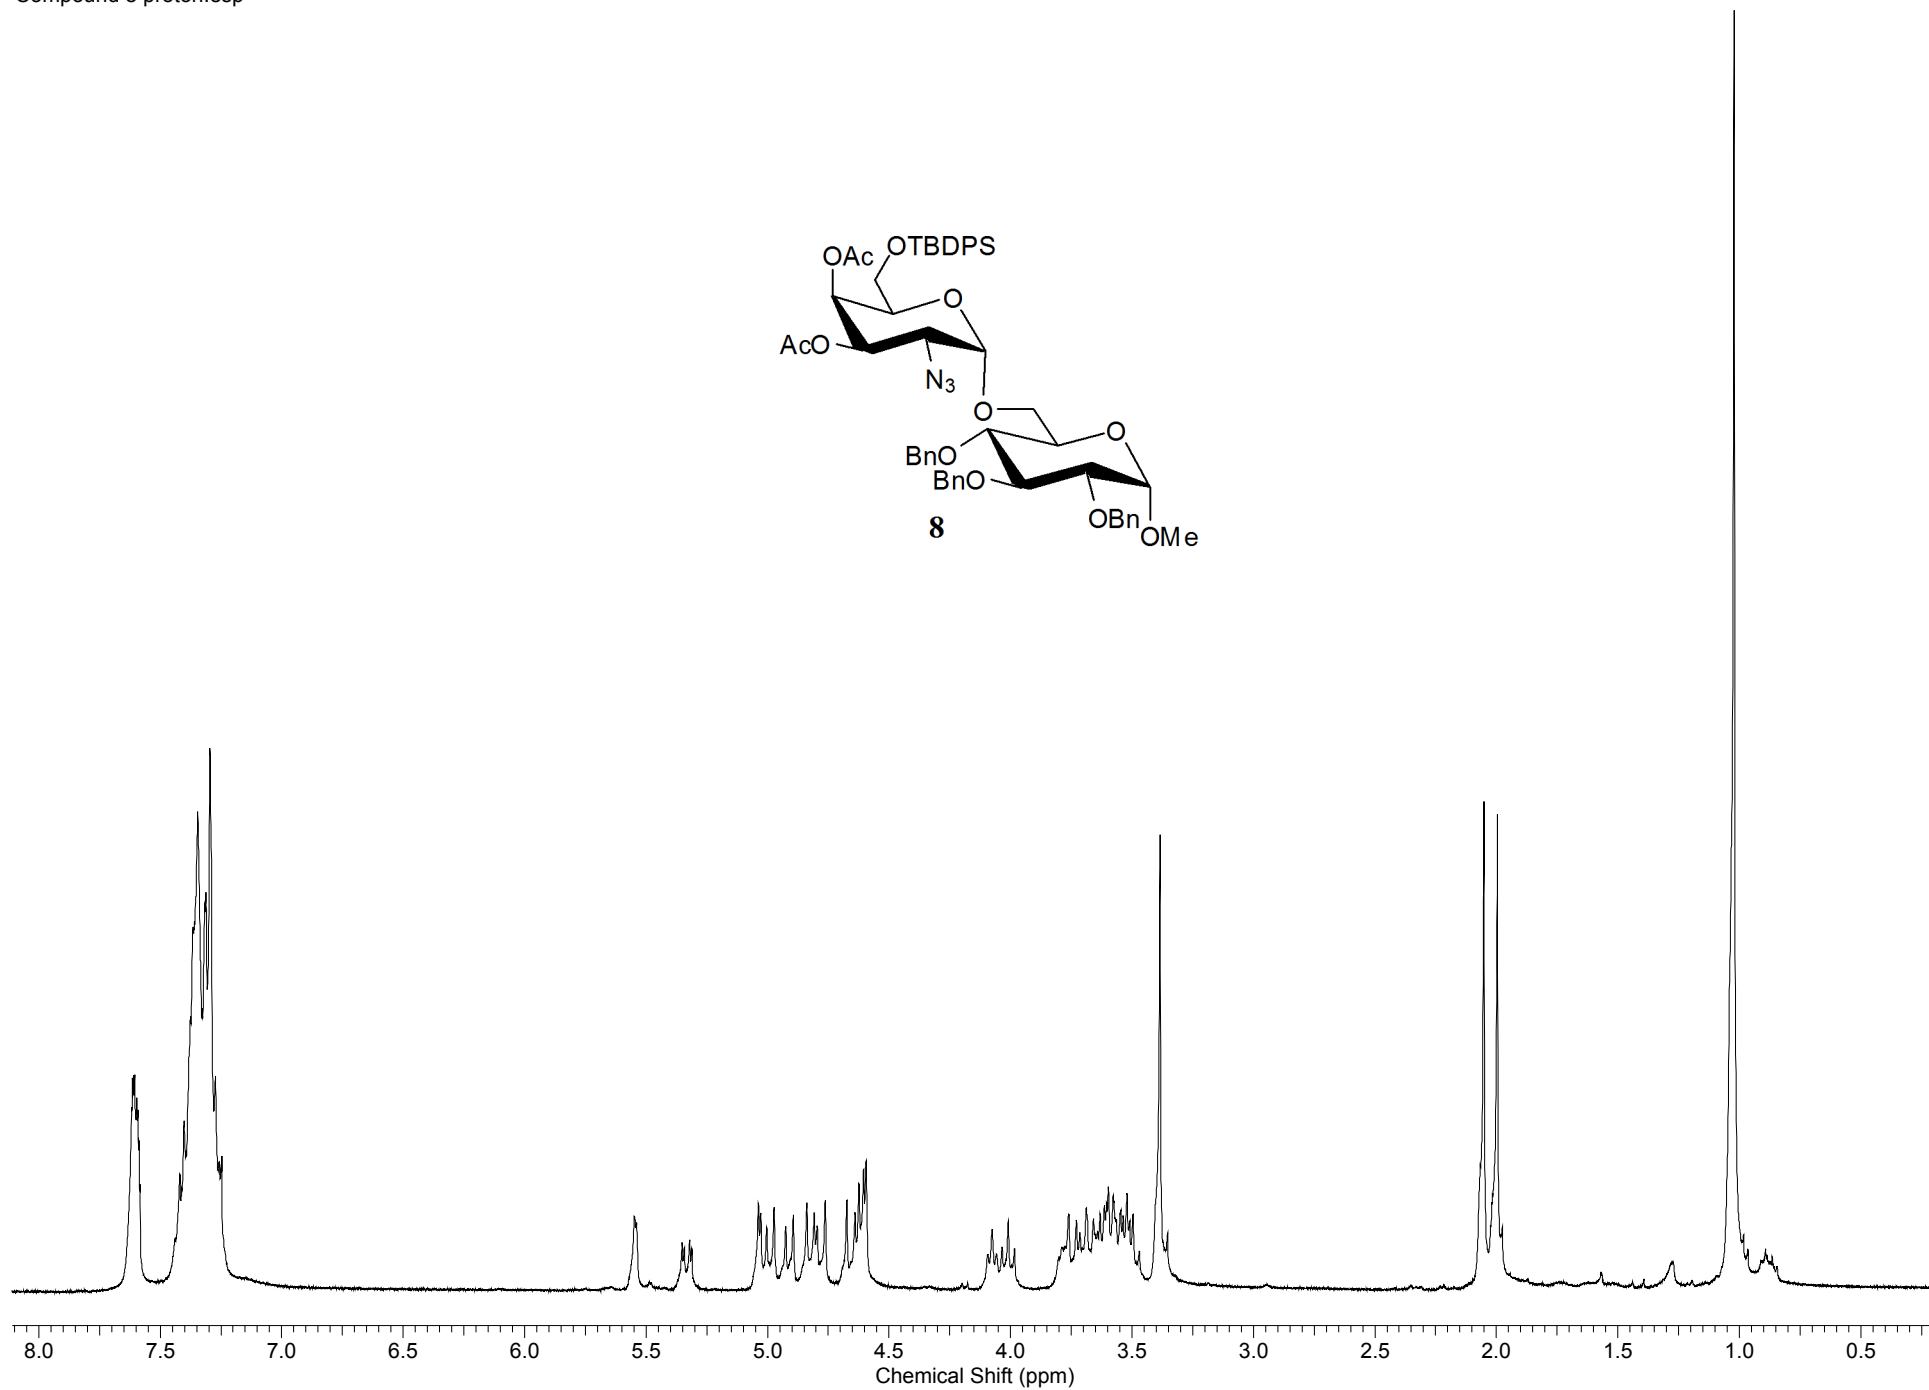

Compound 8 Carbon.esp

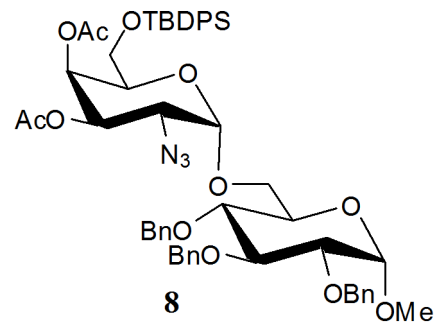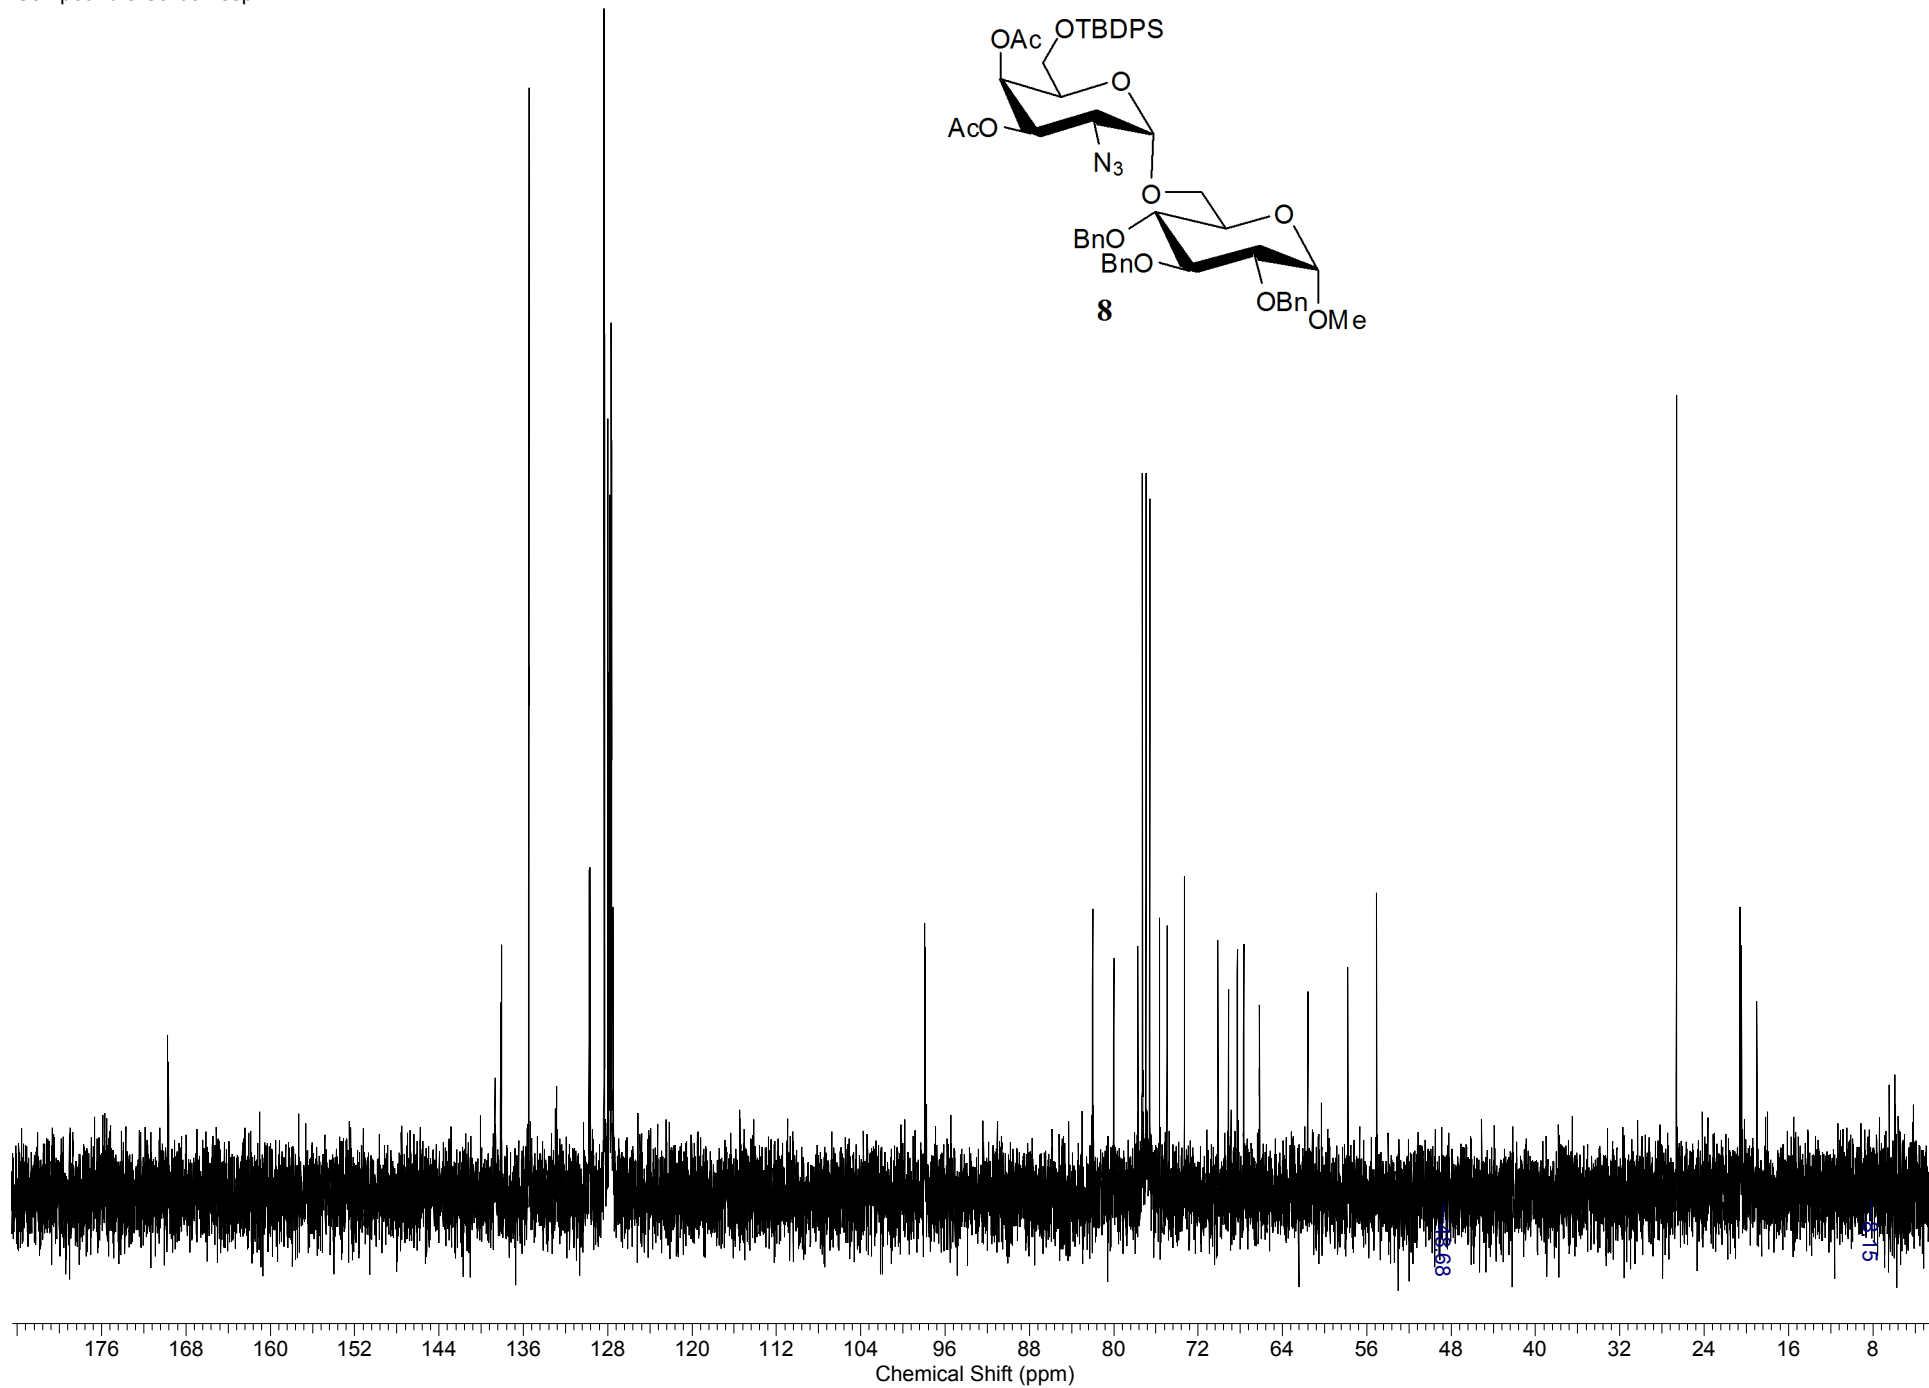

Compound 15.esp

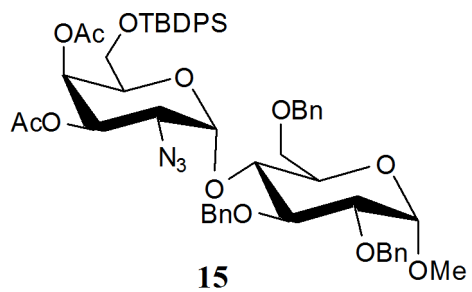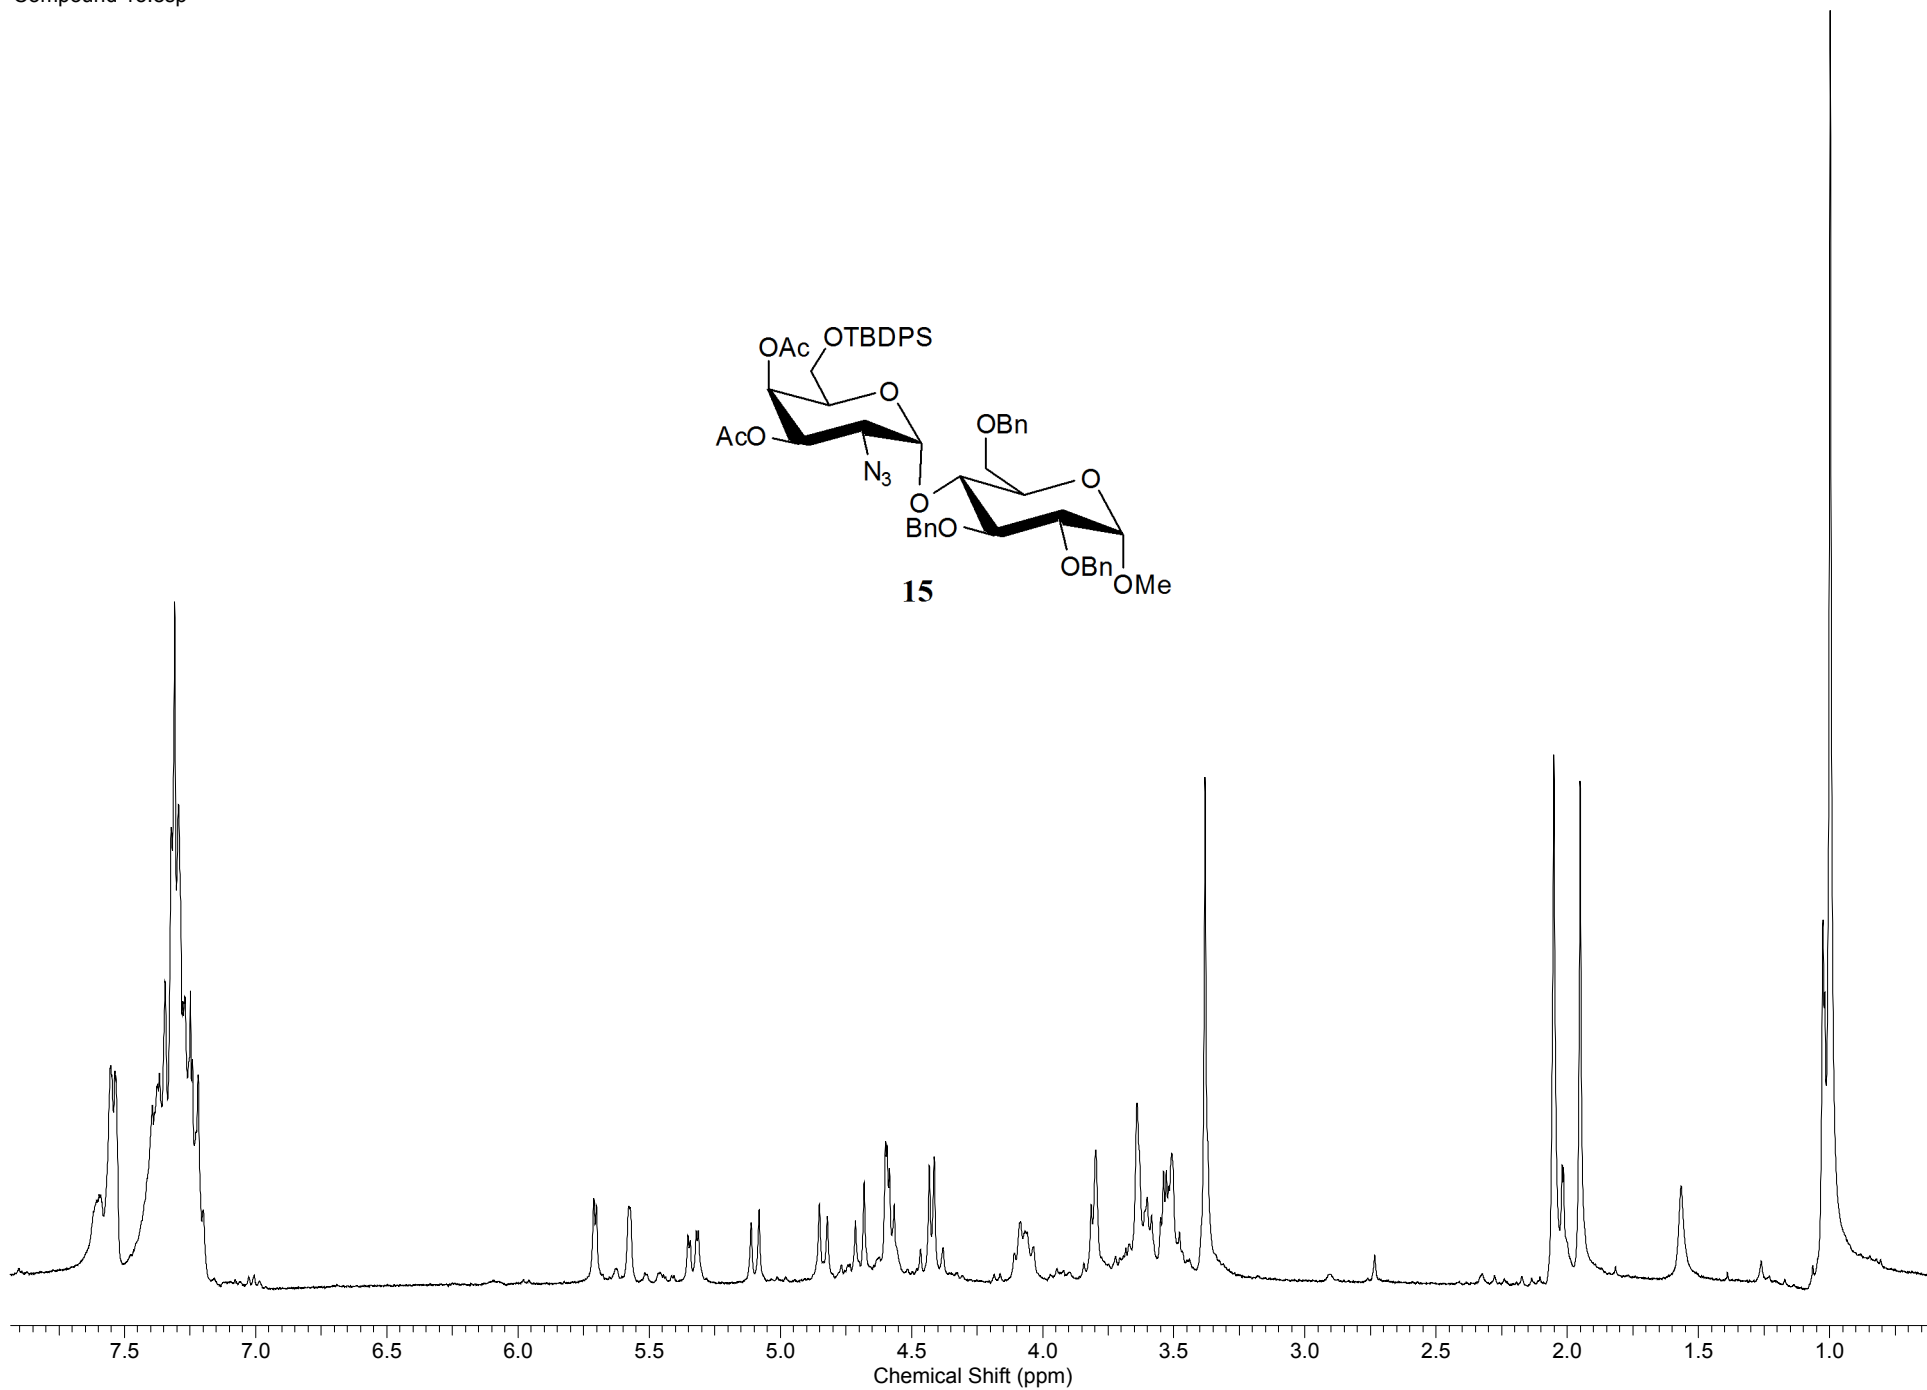

Compound 15 Carbon.esp

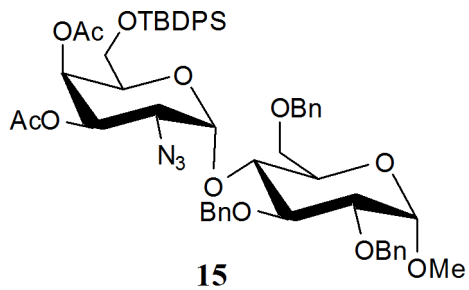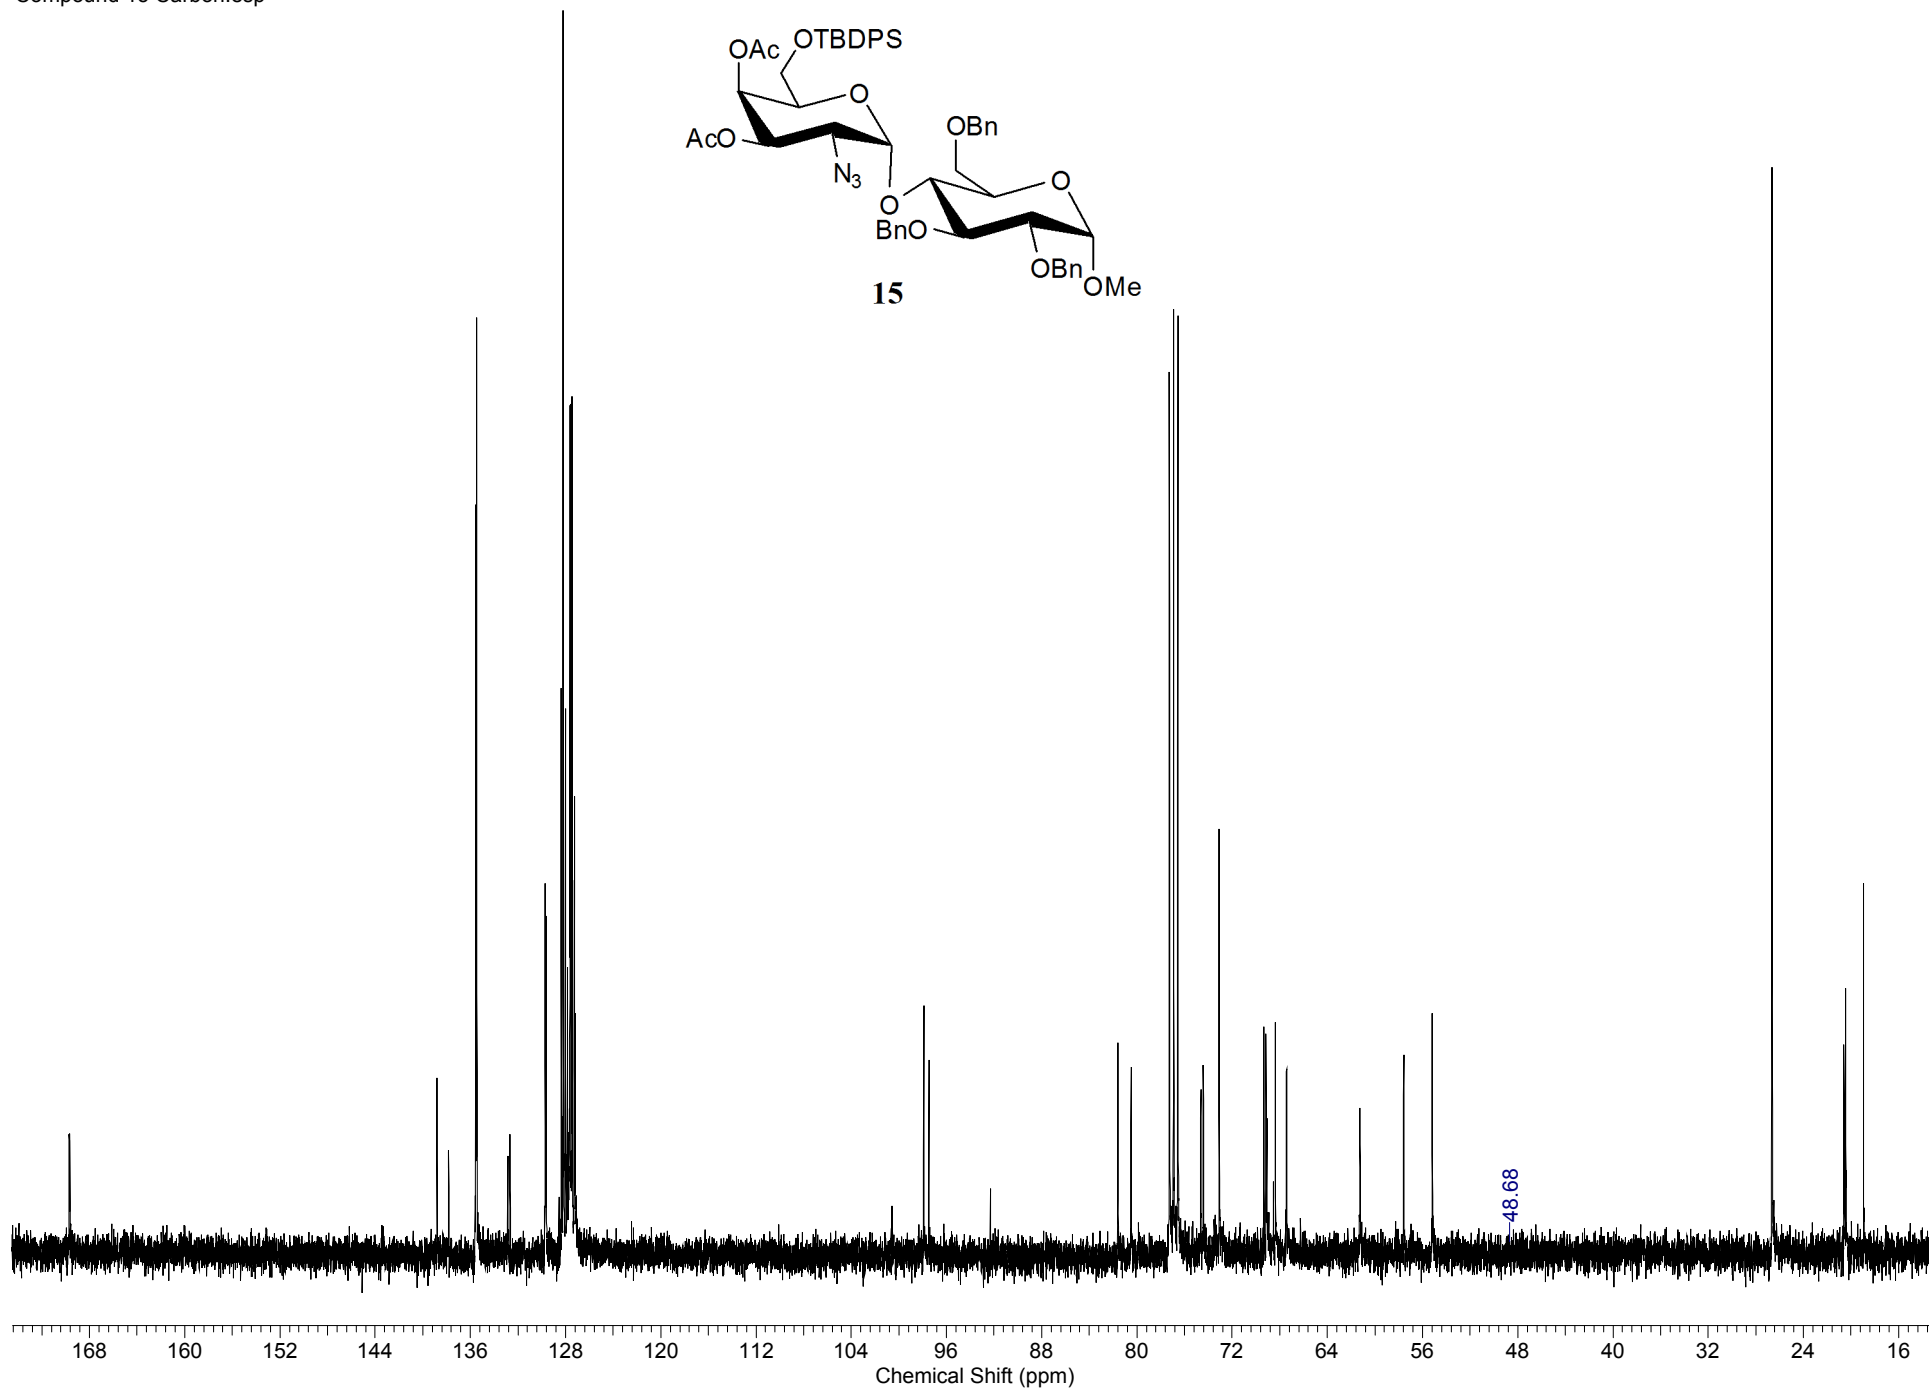

Compound 16 proton.esp

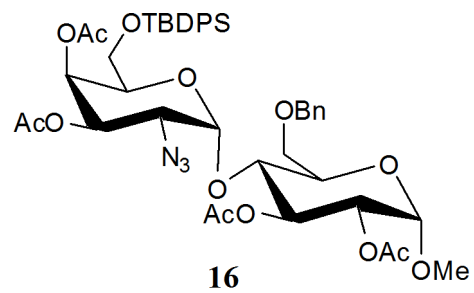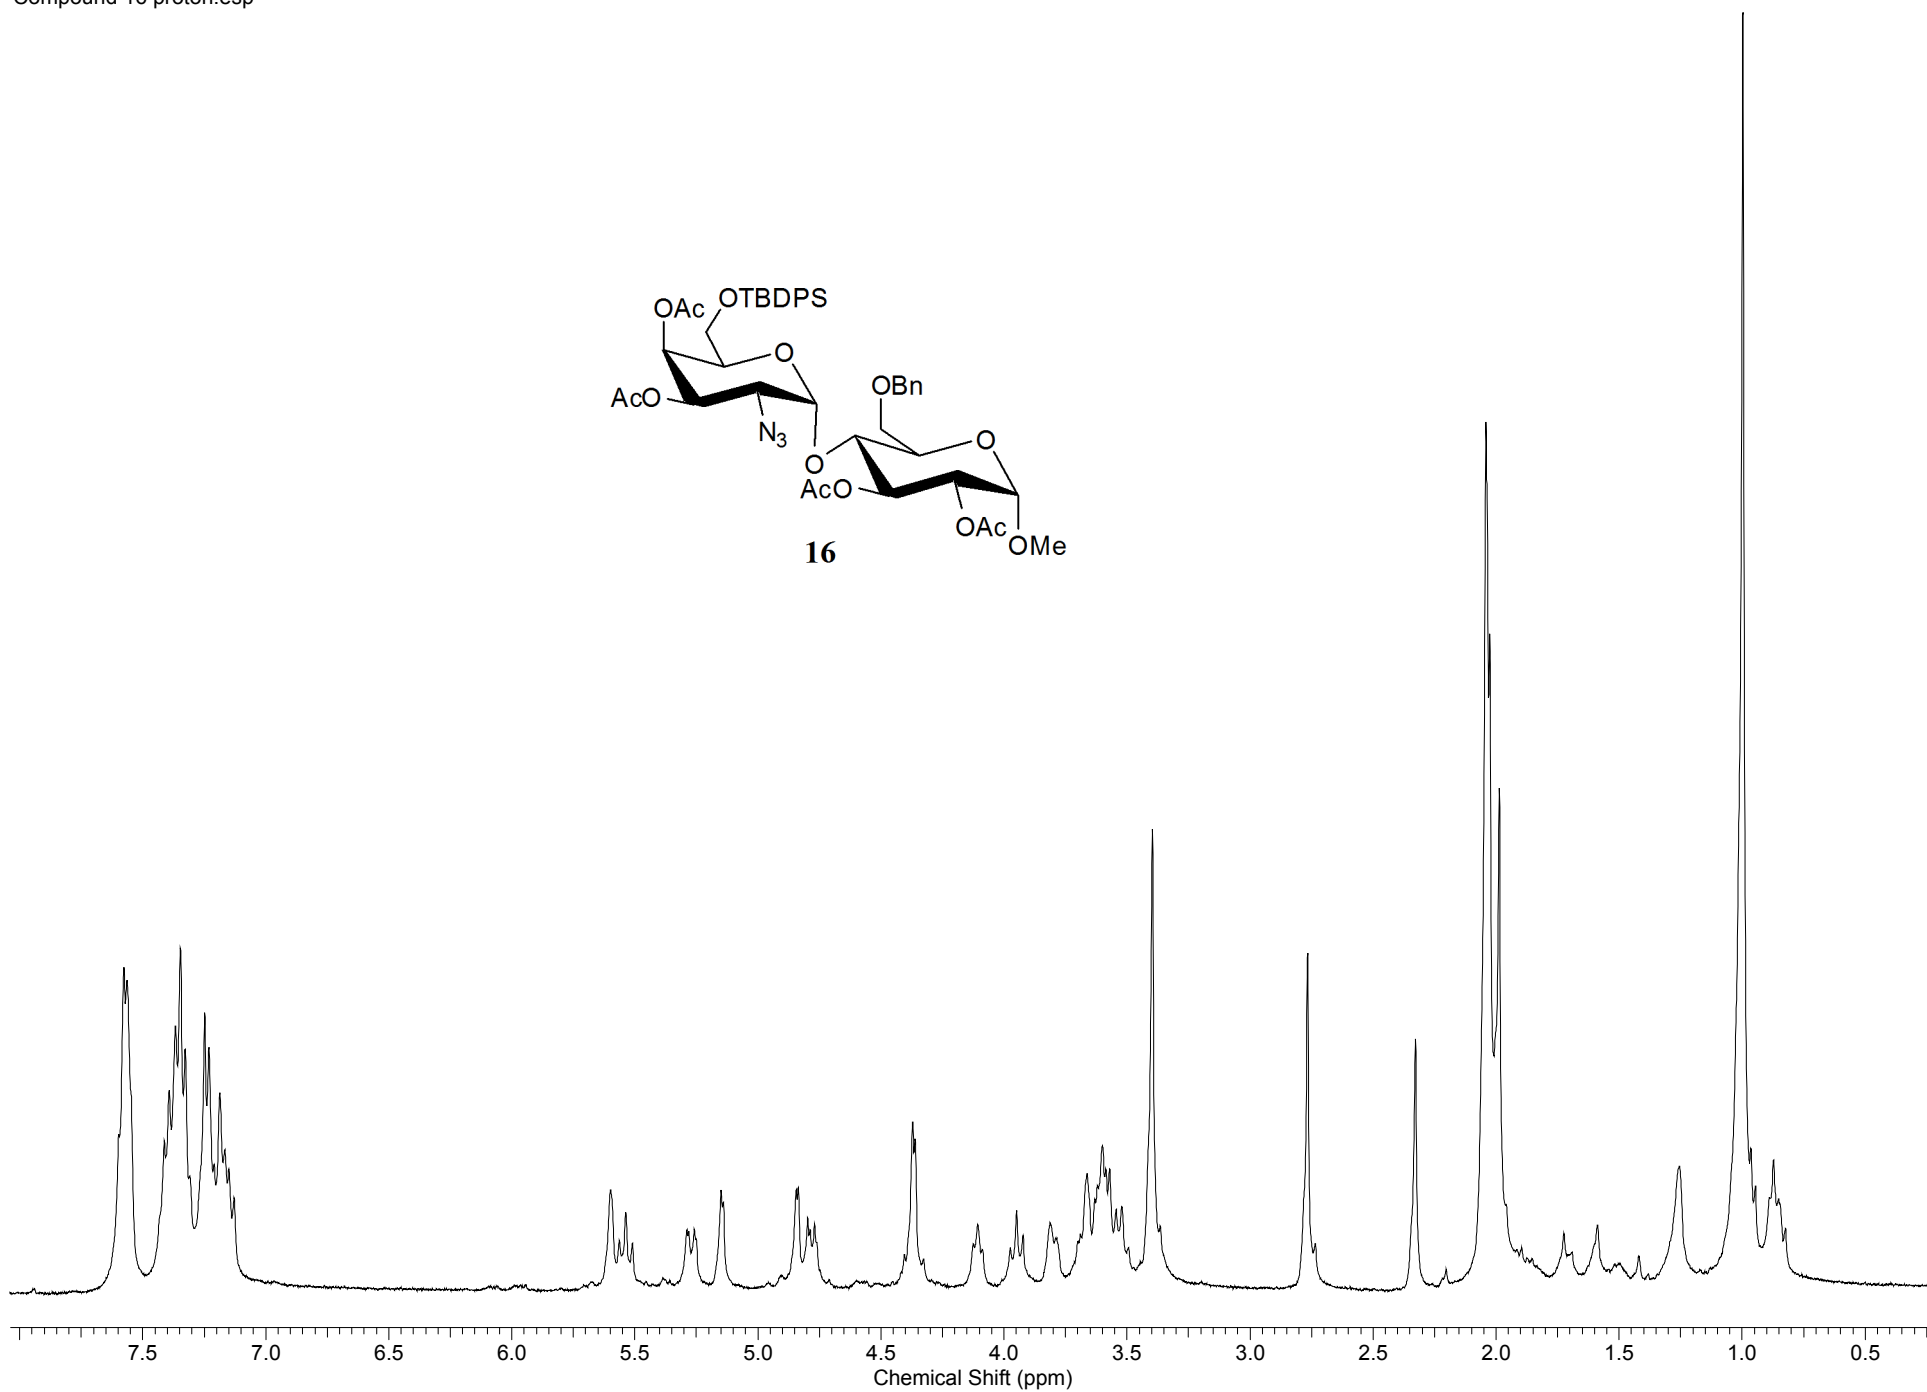

Compound 16 Carbon.esp

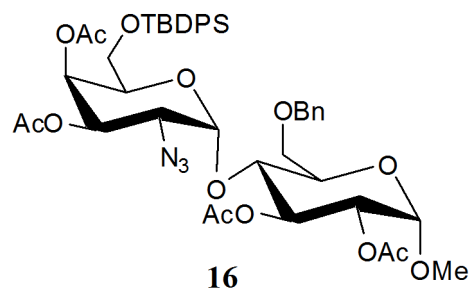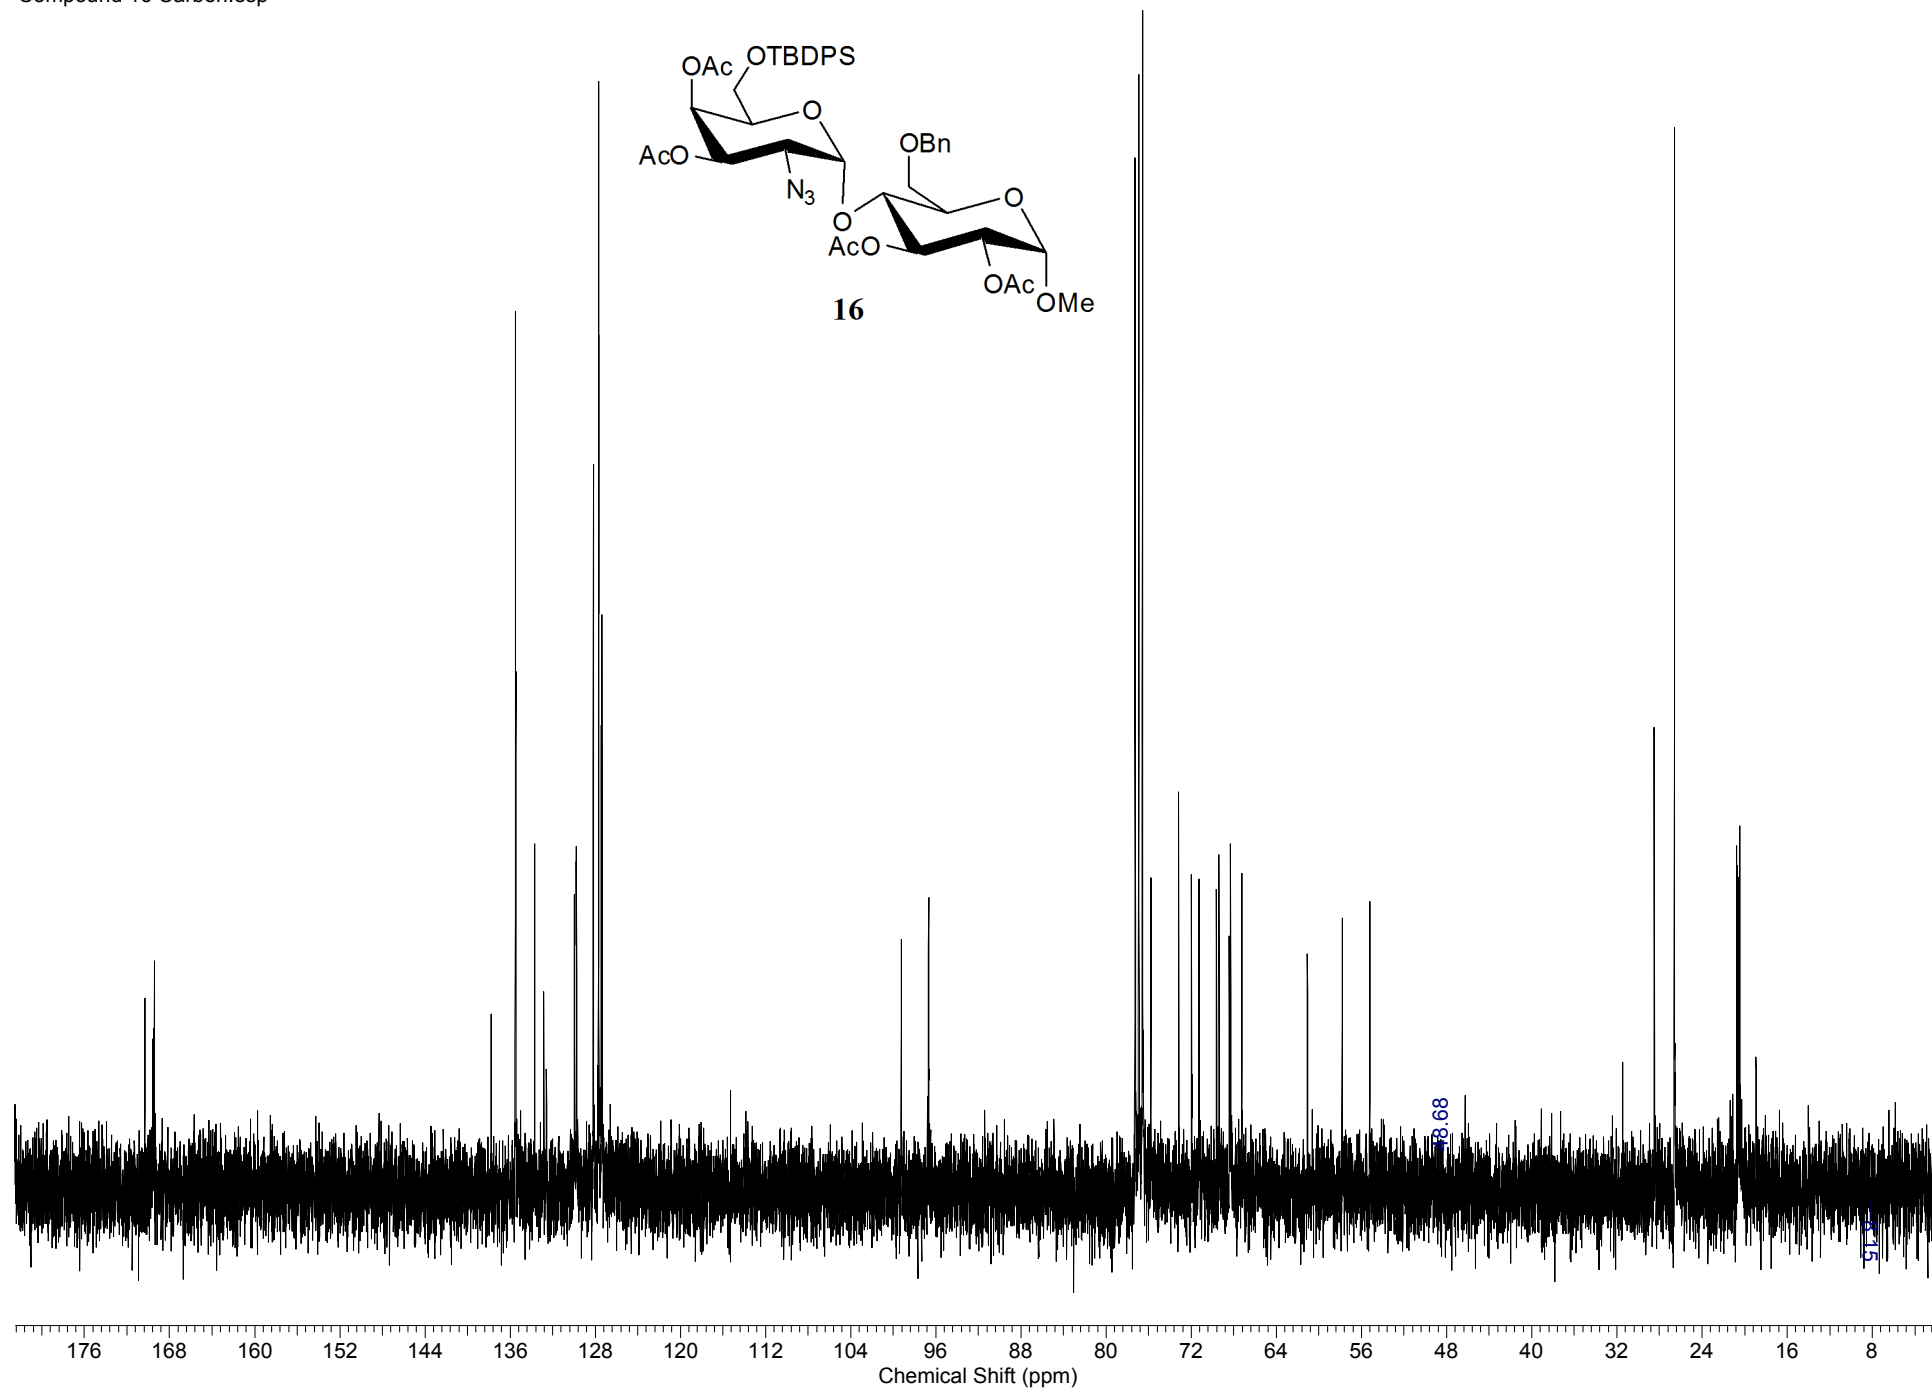

Compound 17 proton.esp

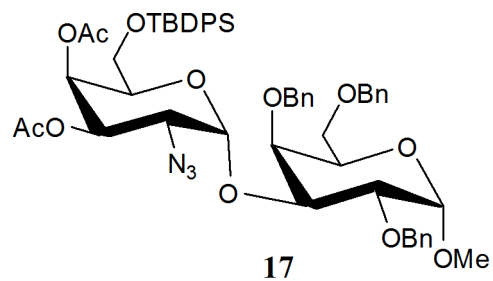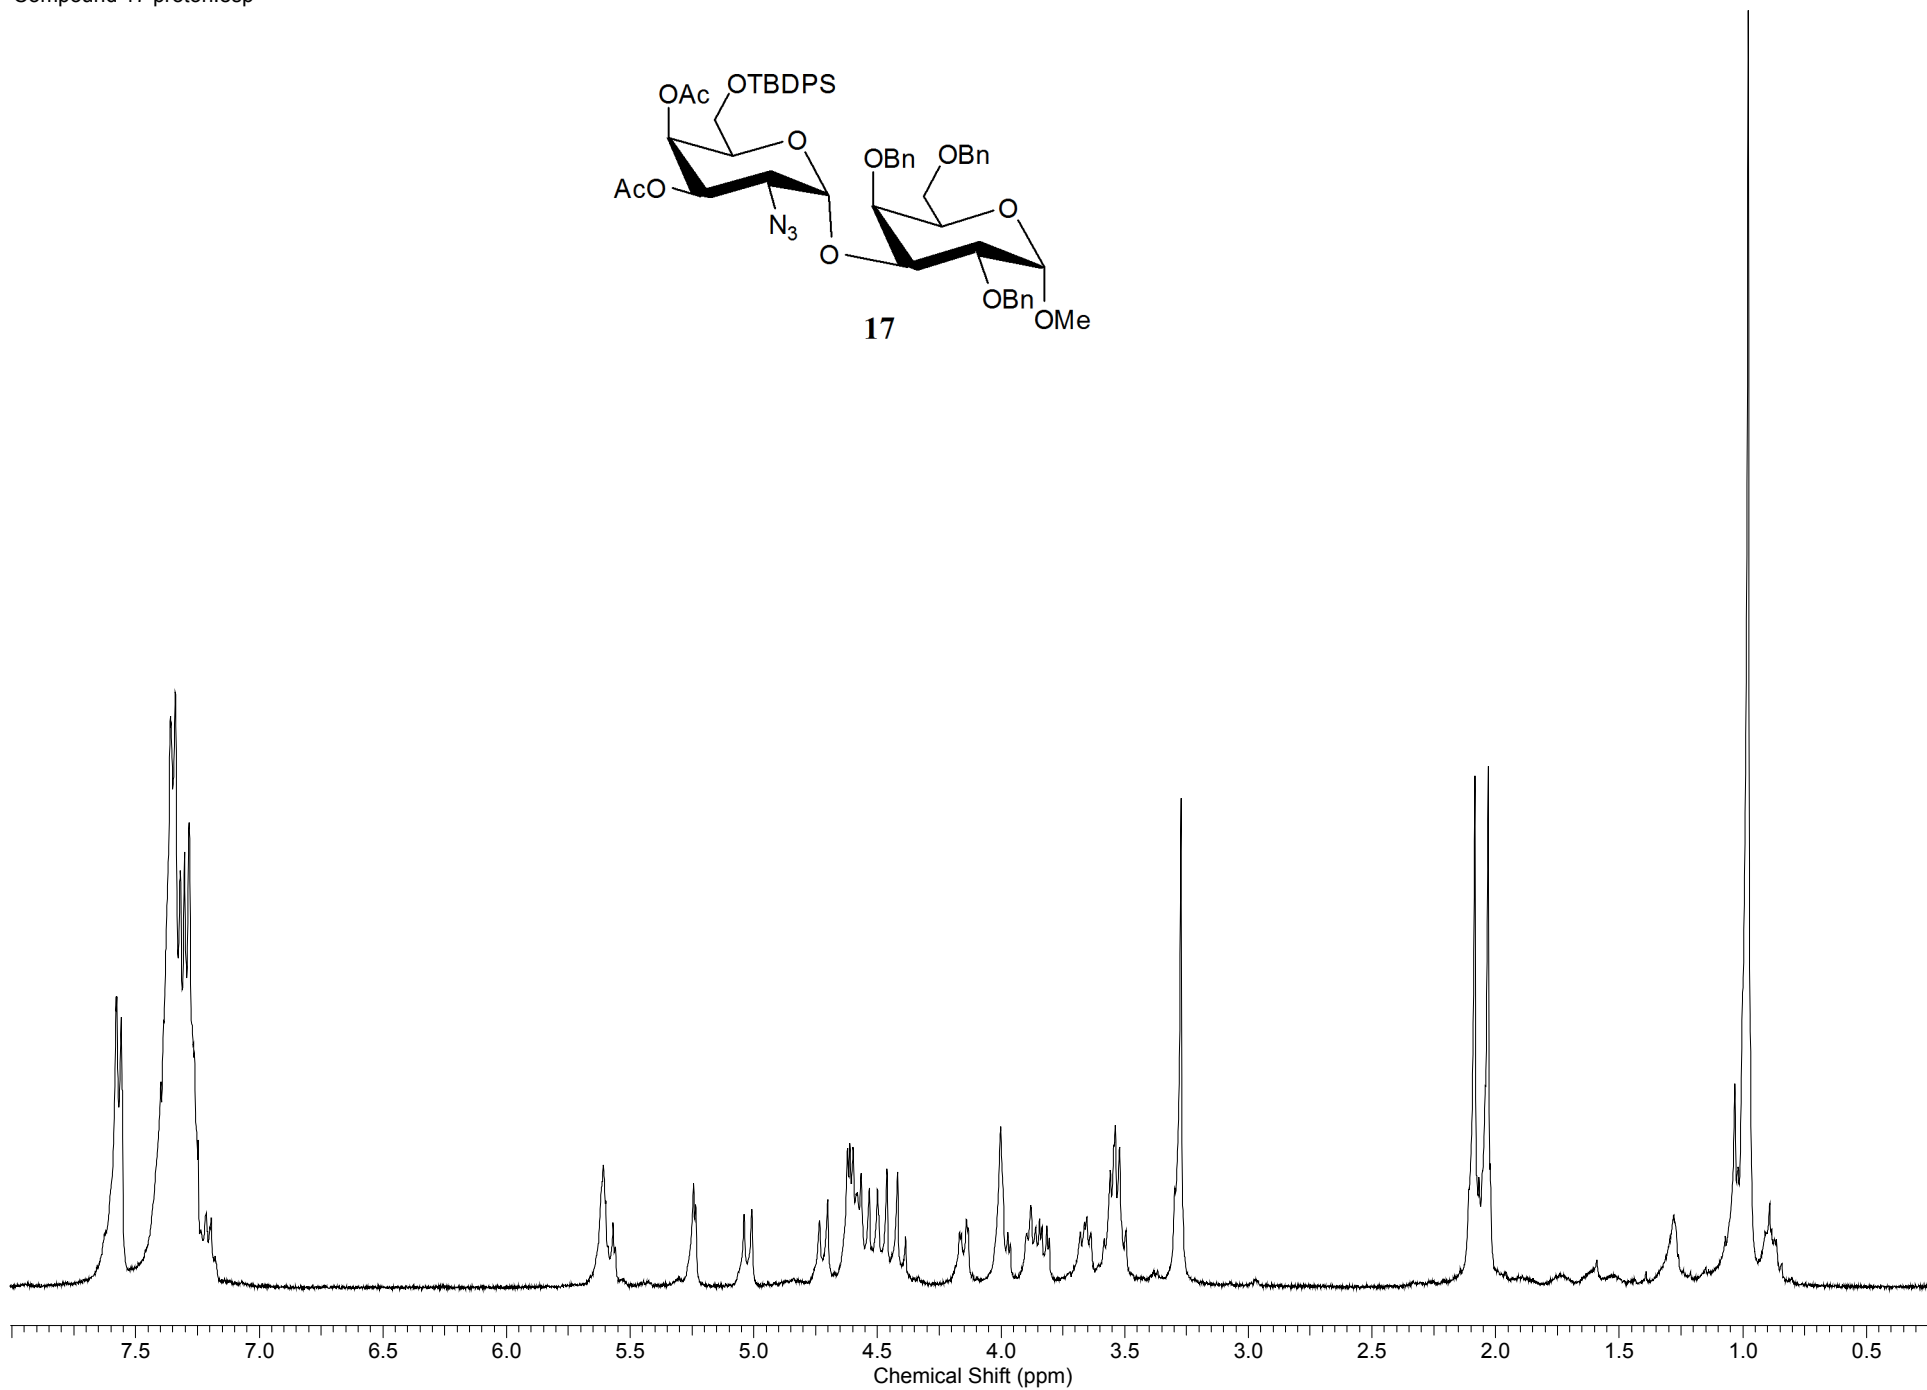

Compound 17 Carbon.esp

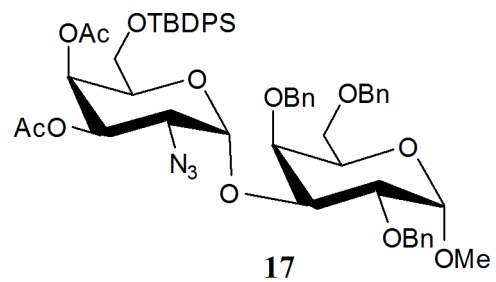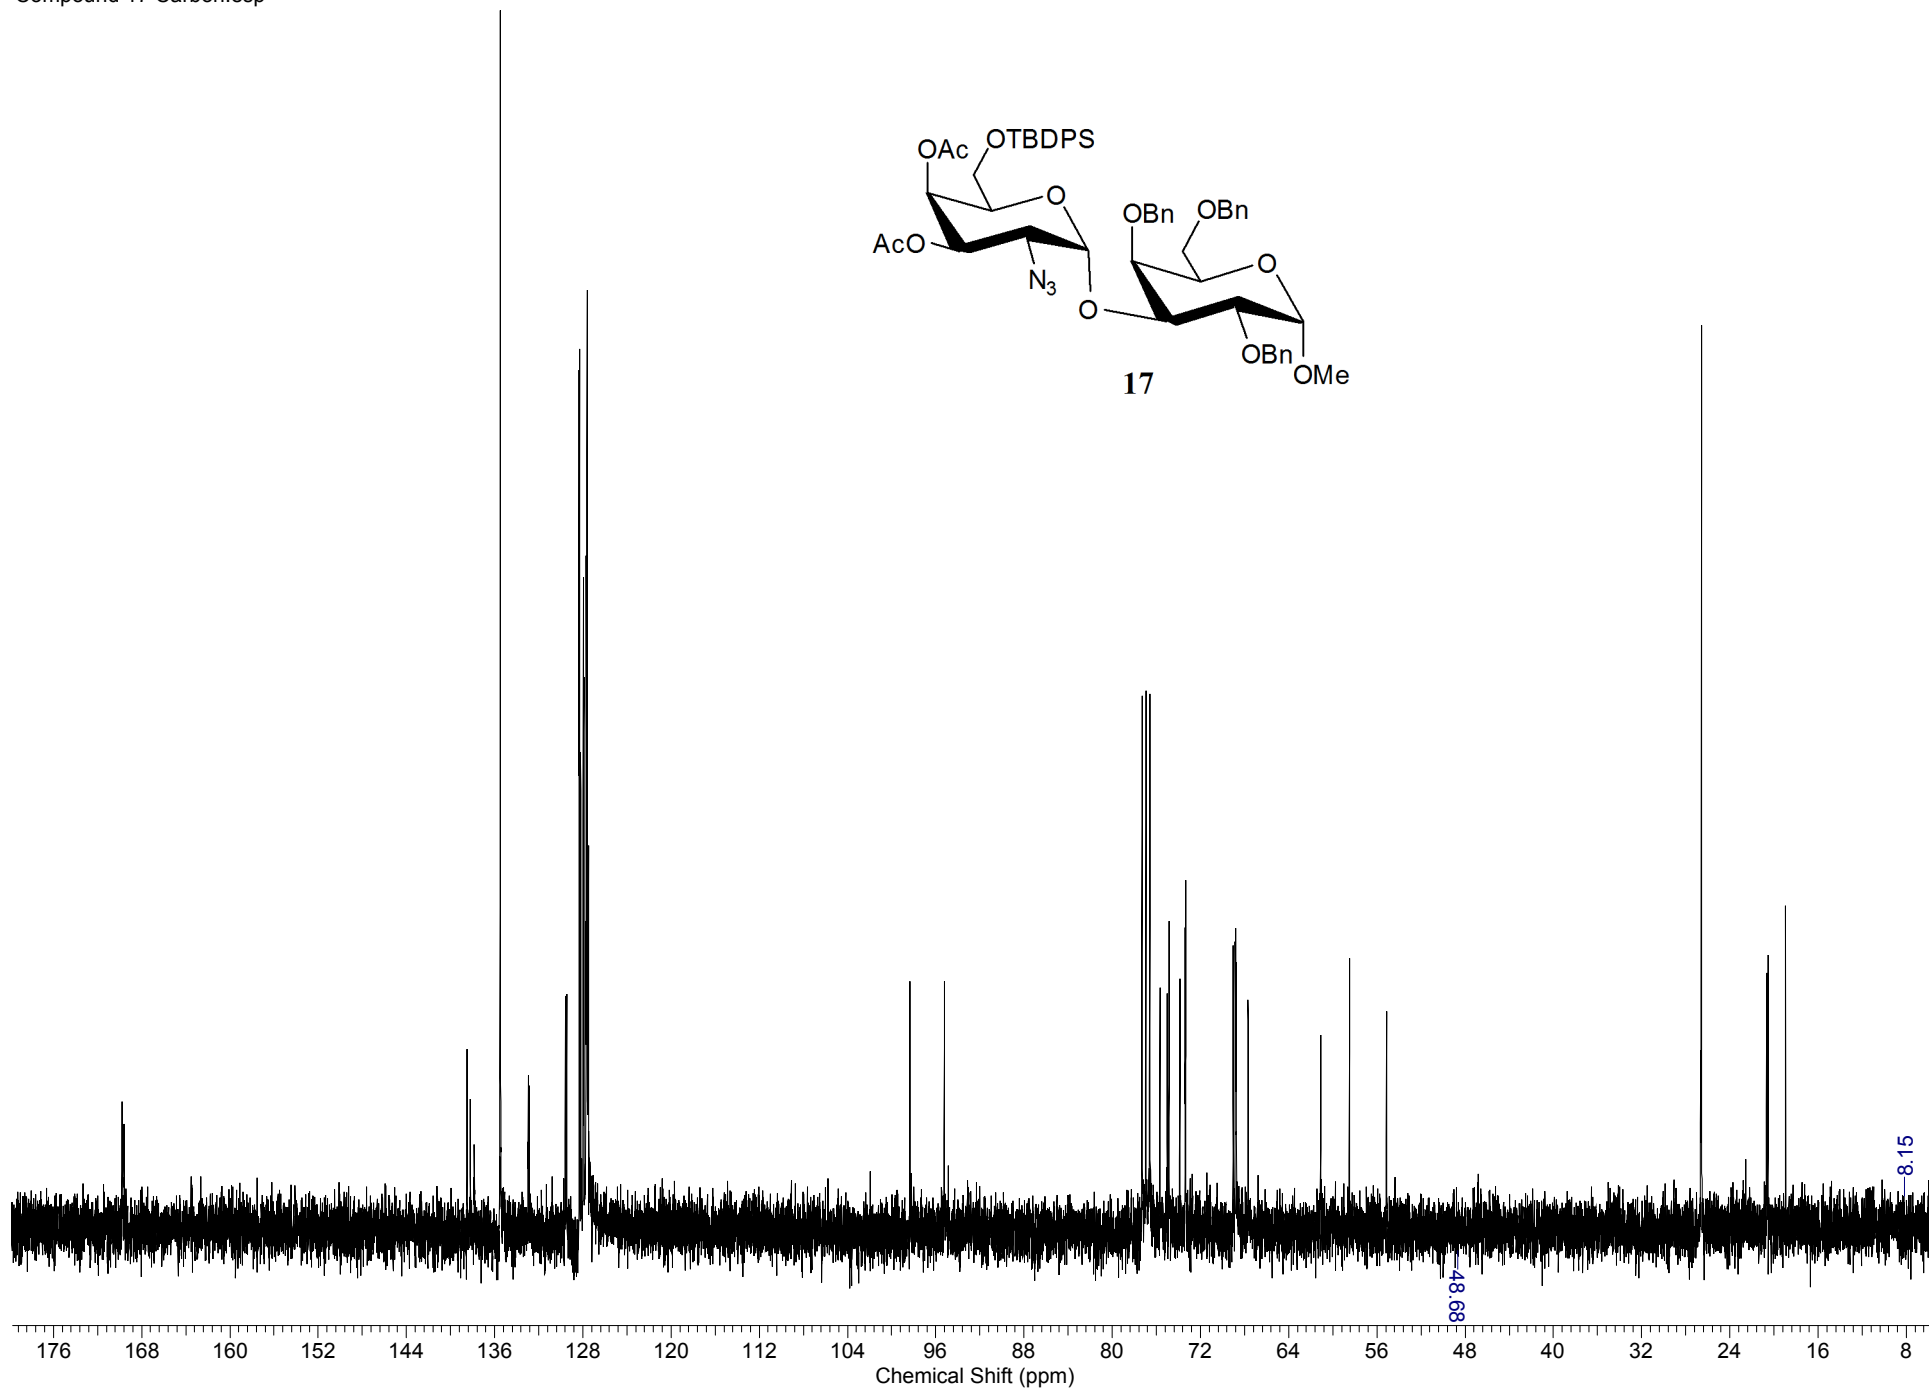



Compound 18 proton.esp

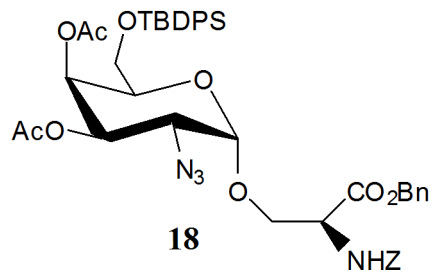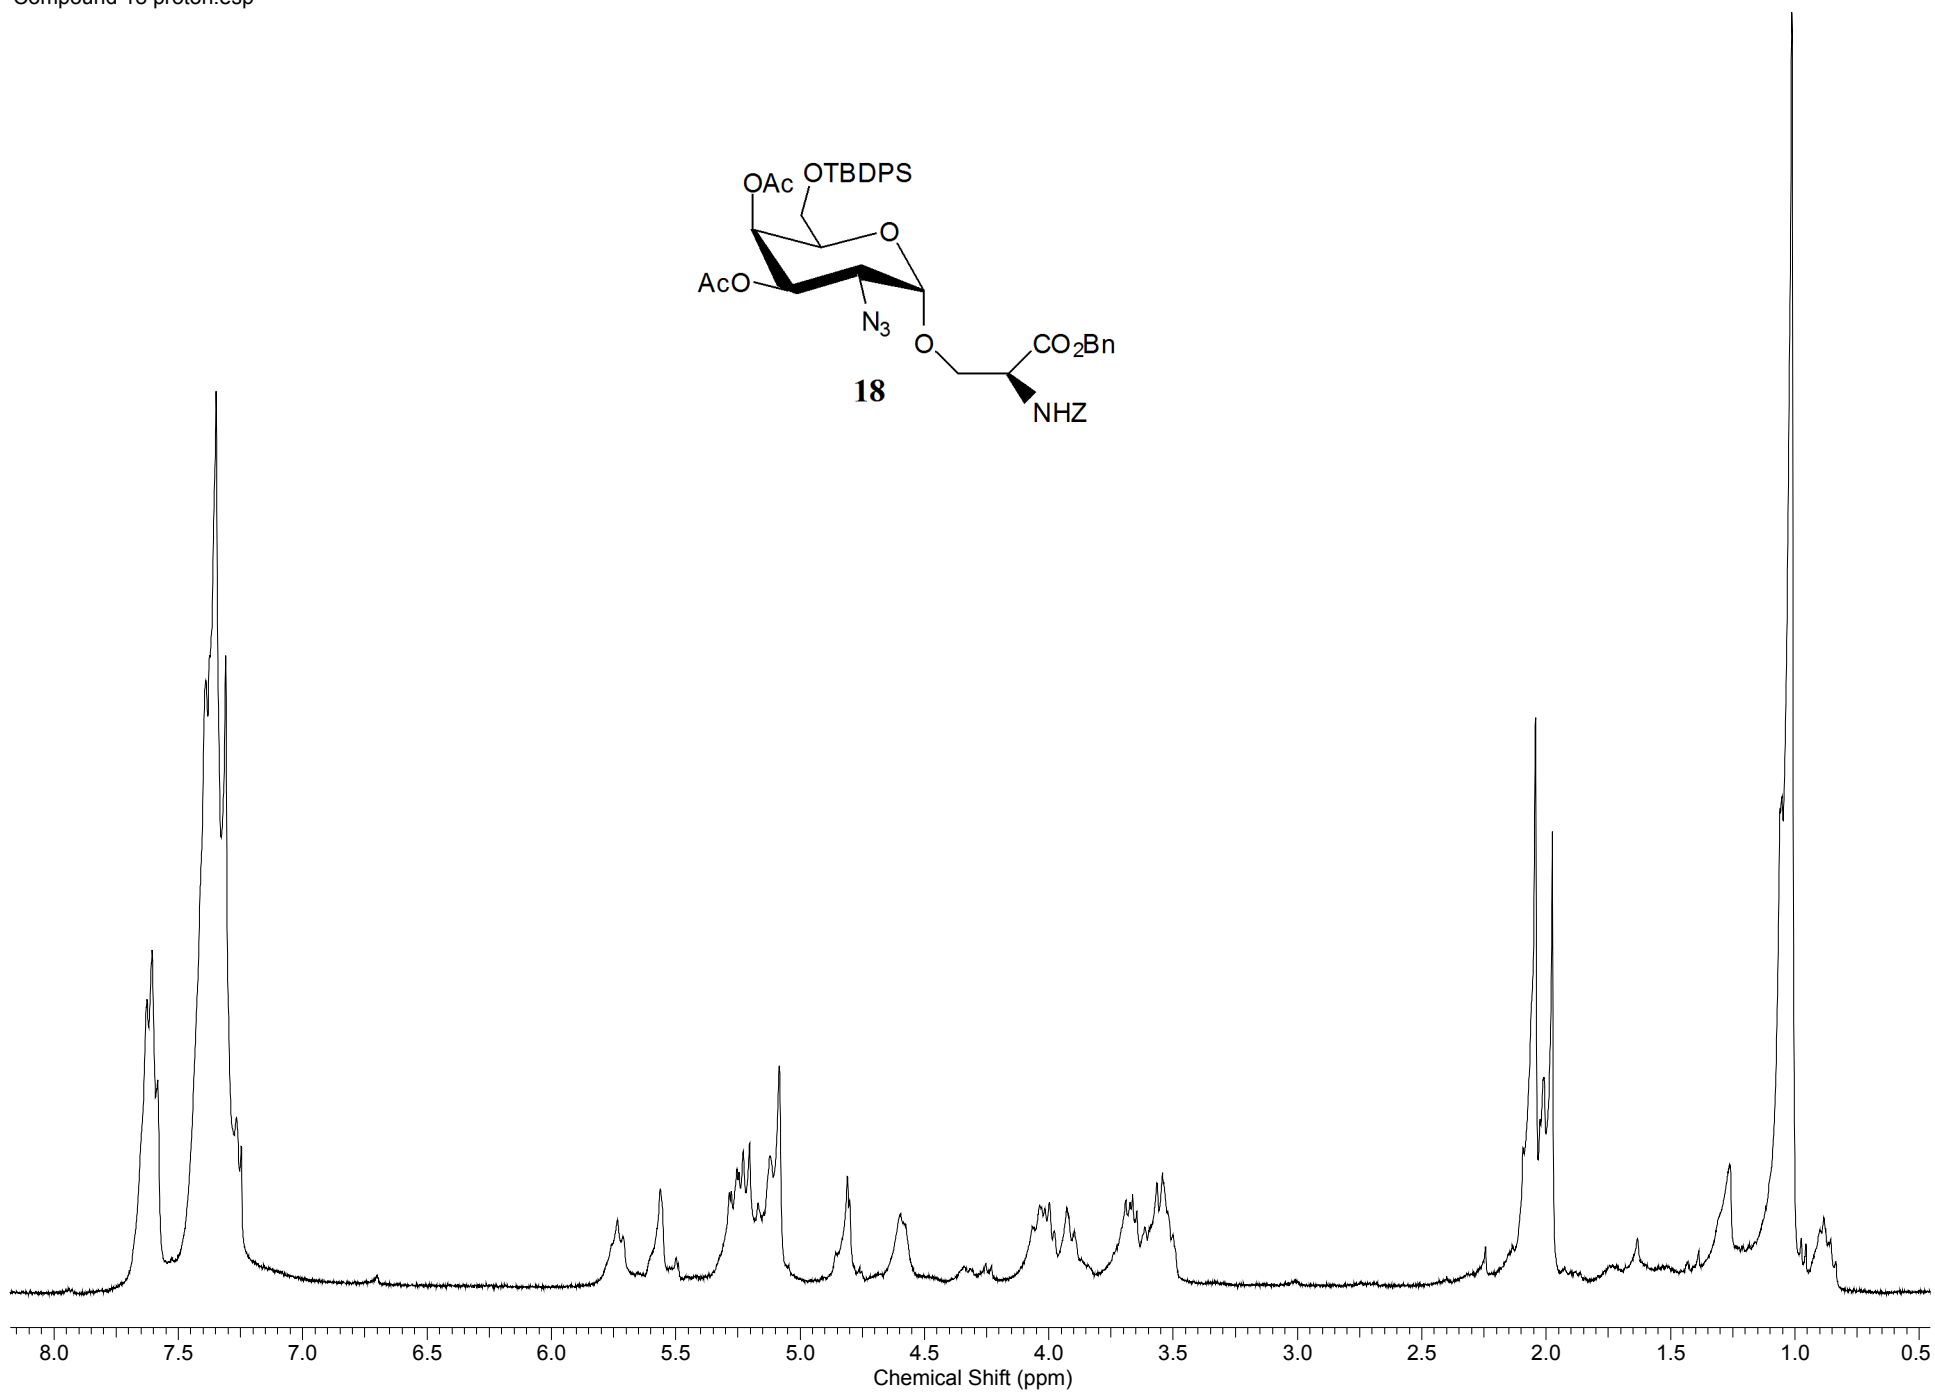

Compound 18 Carbon.esp

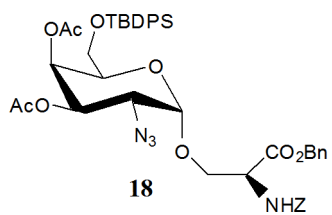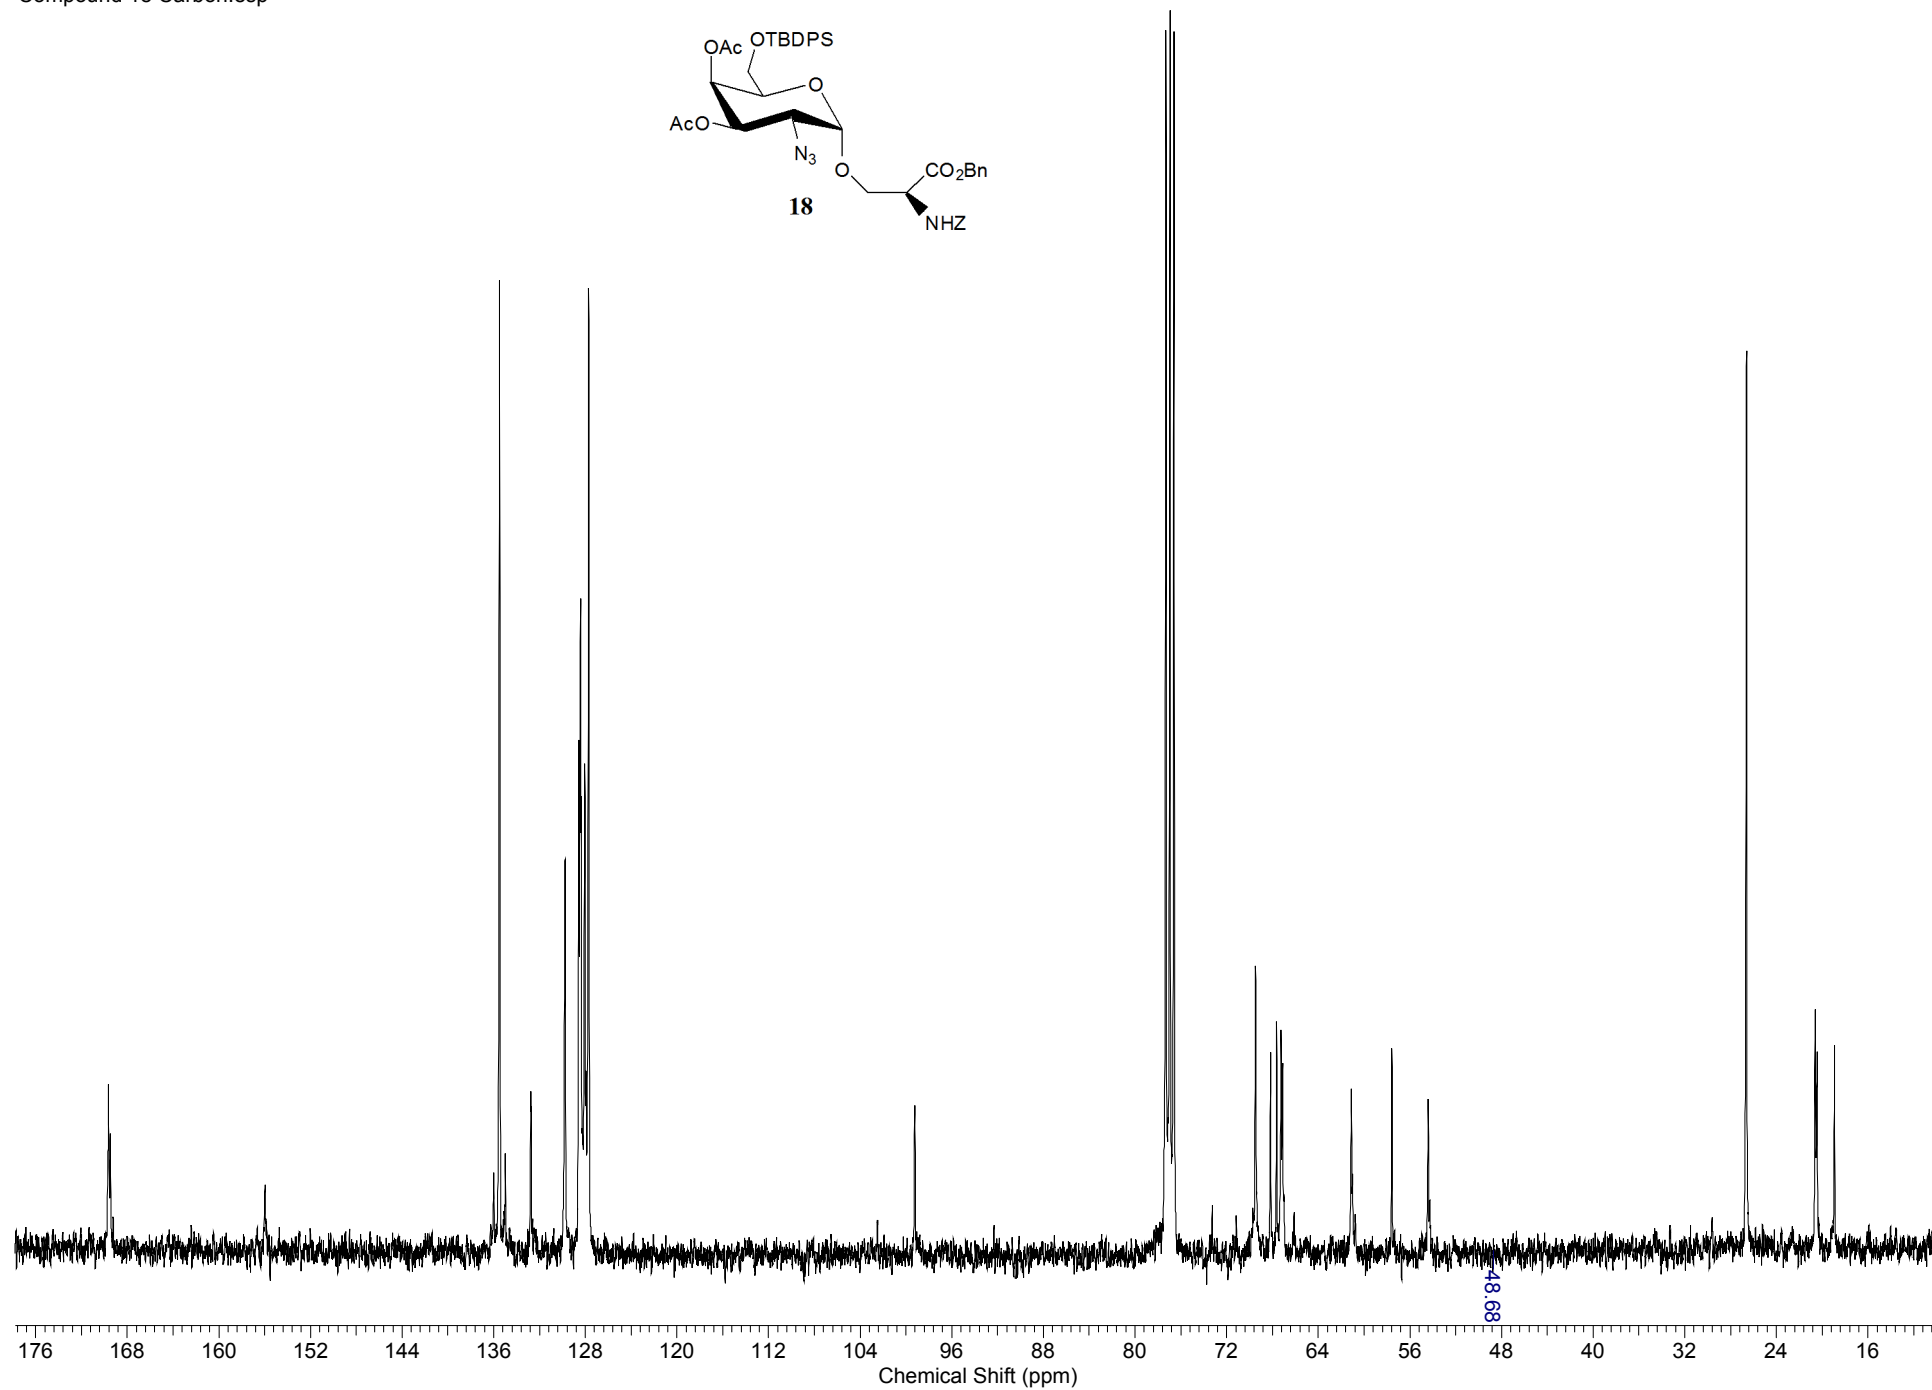

Compound 19.esp

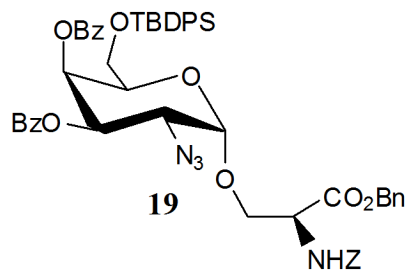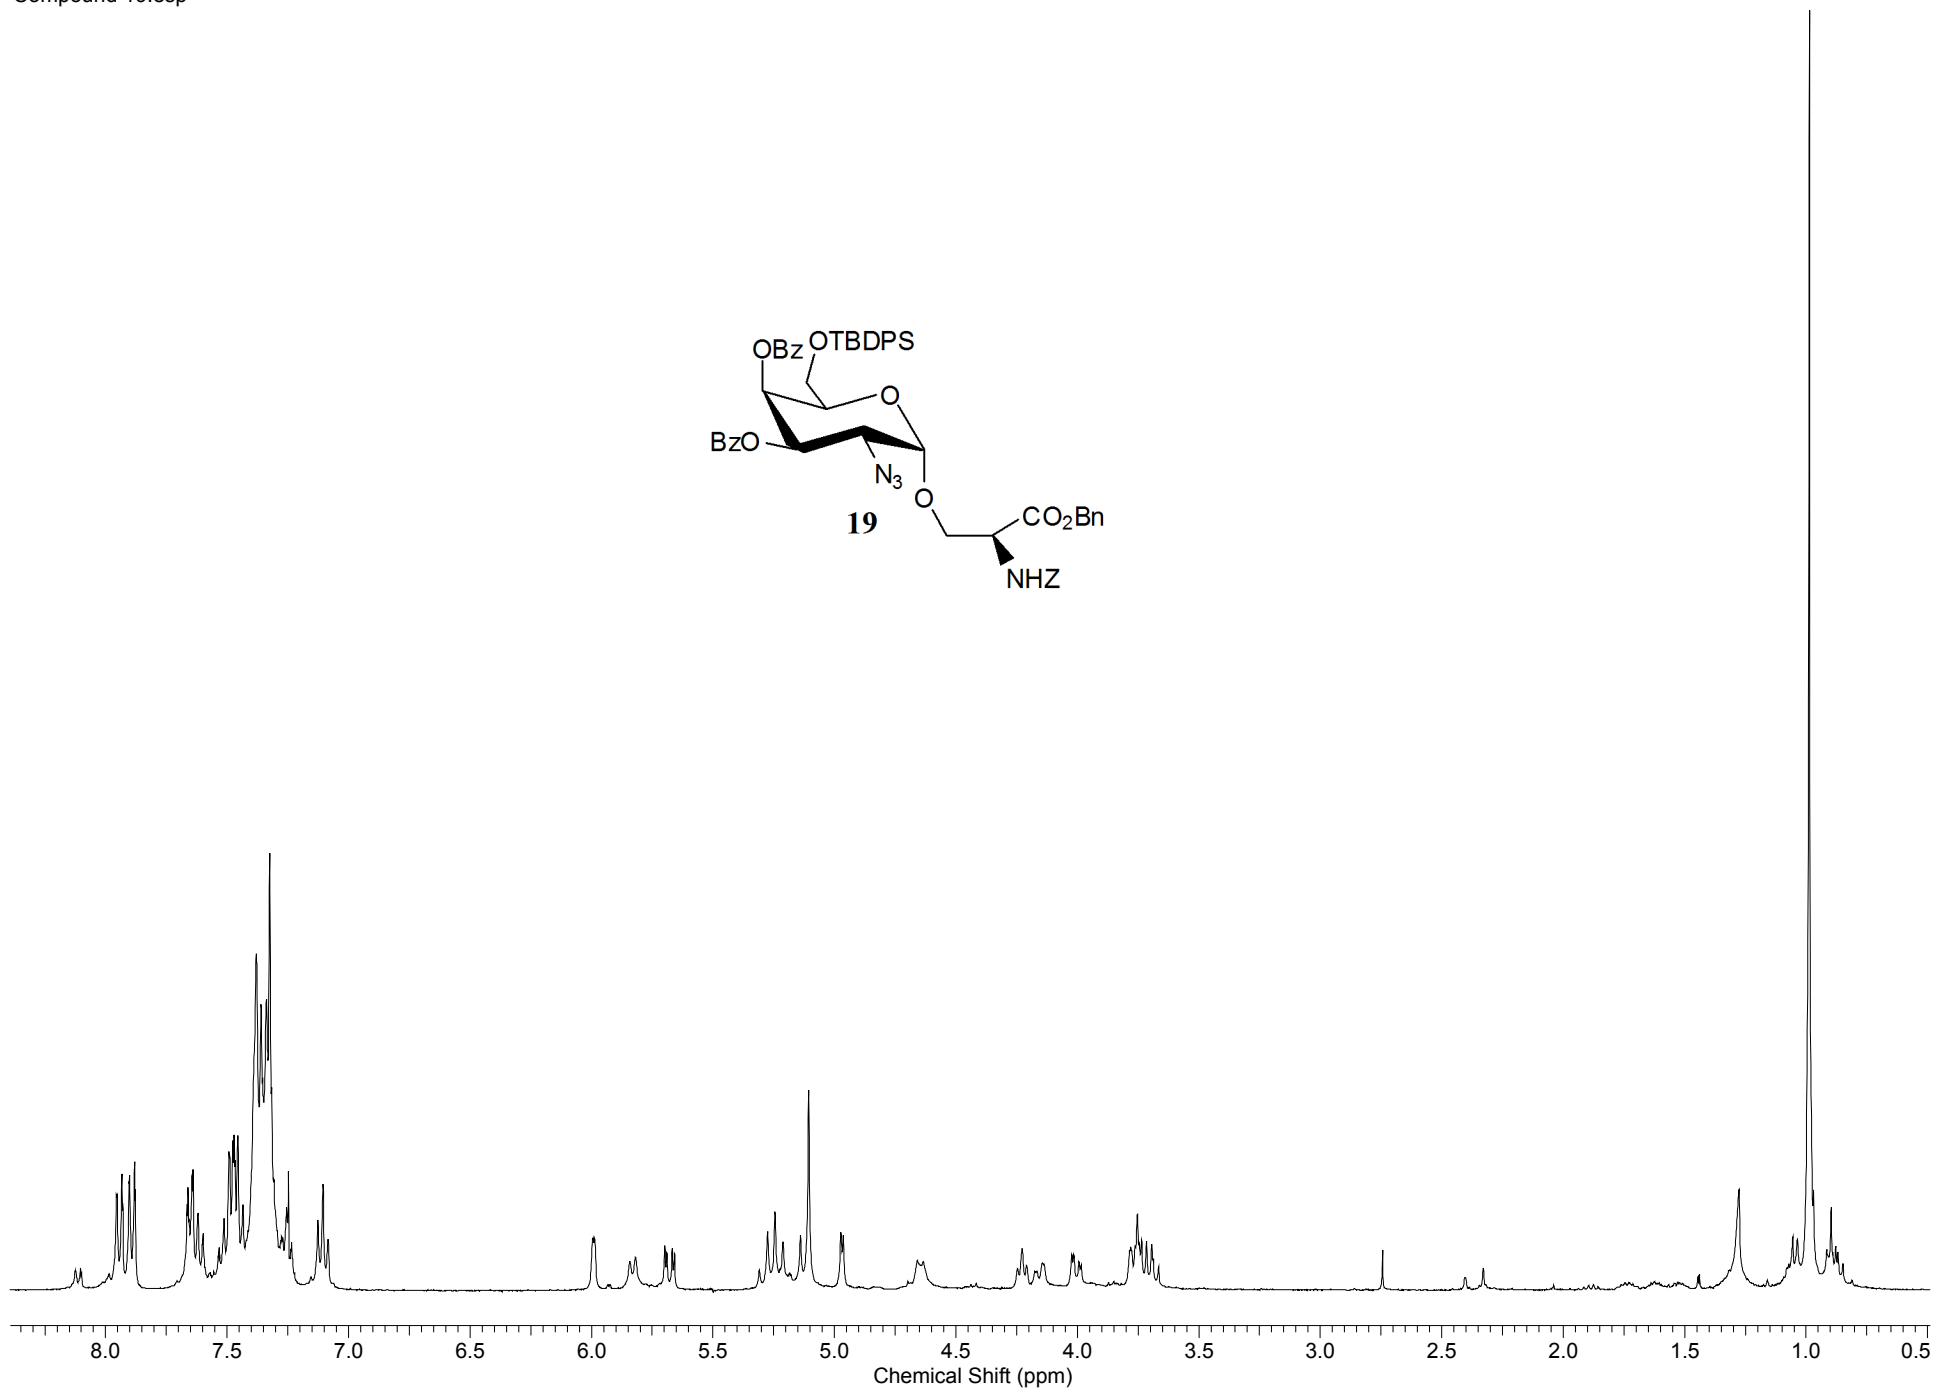

Compound 19 Carbon.esp

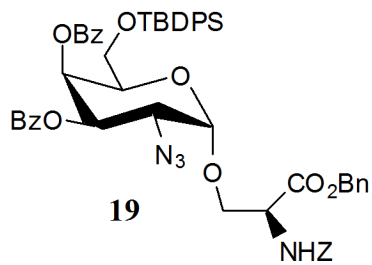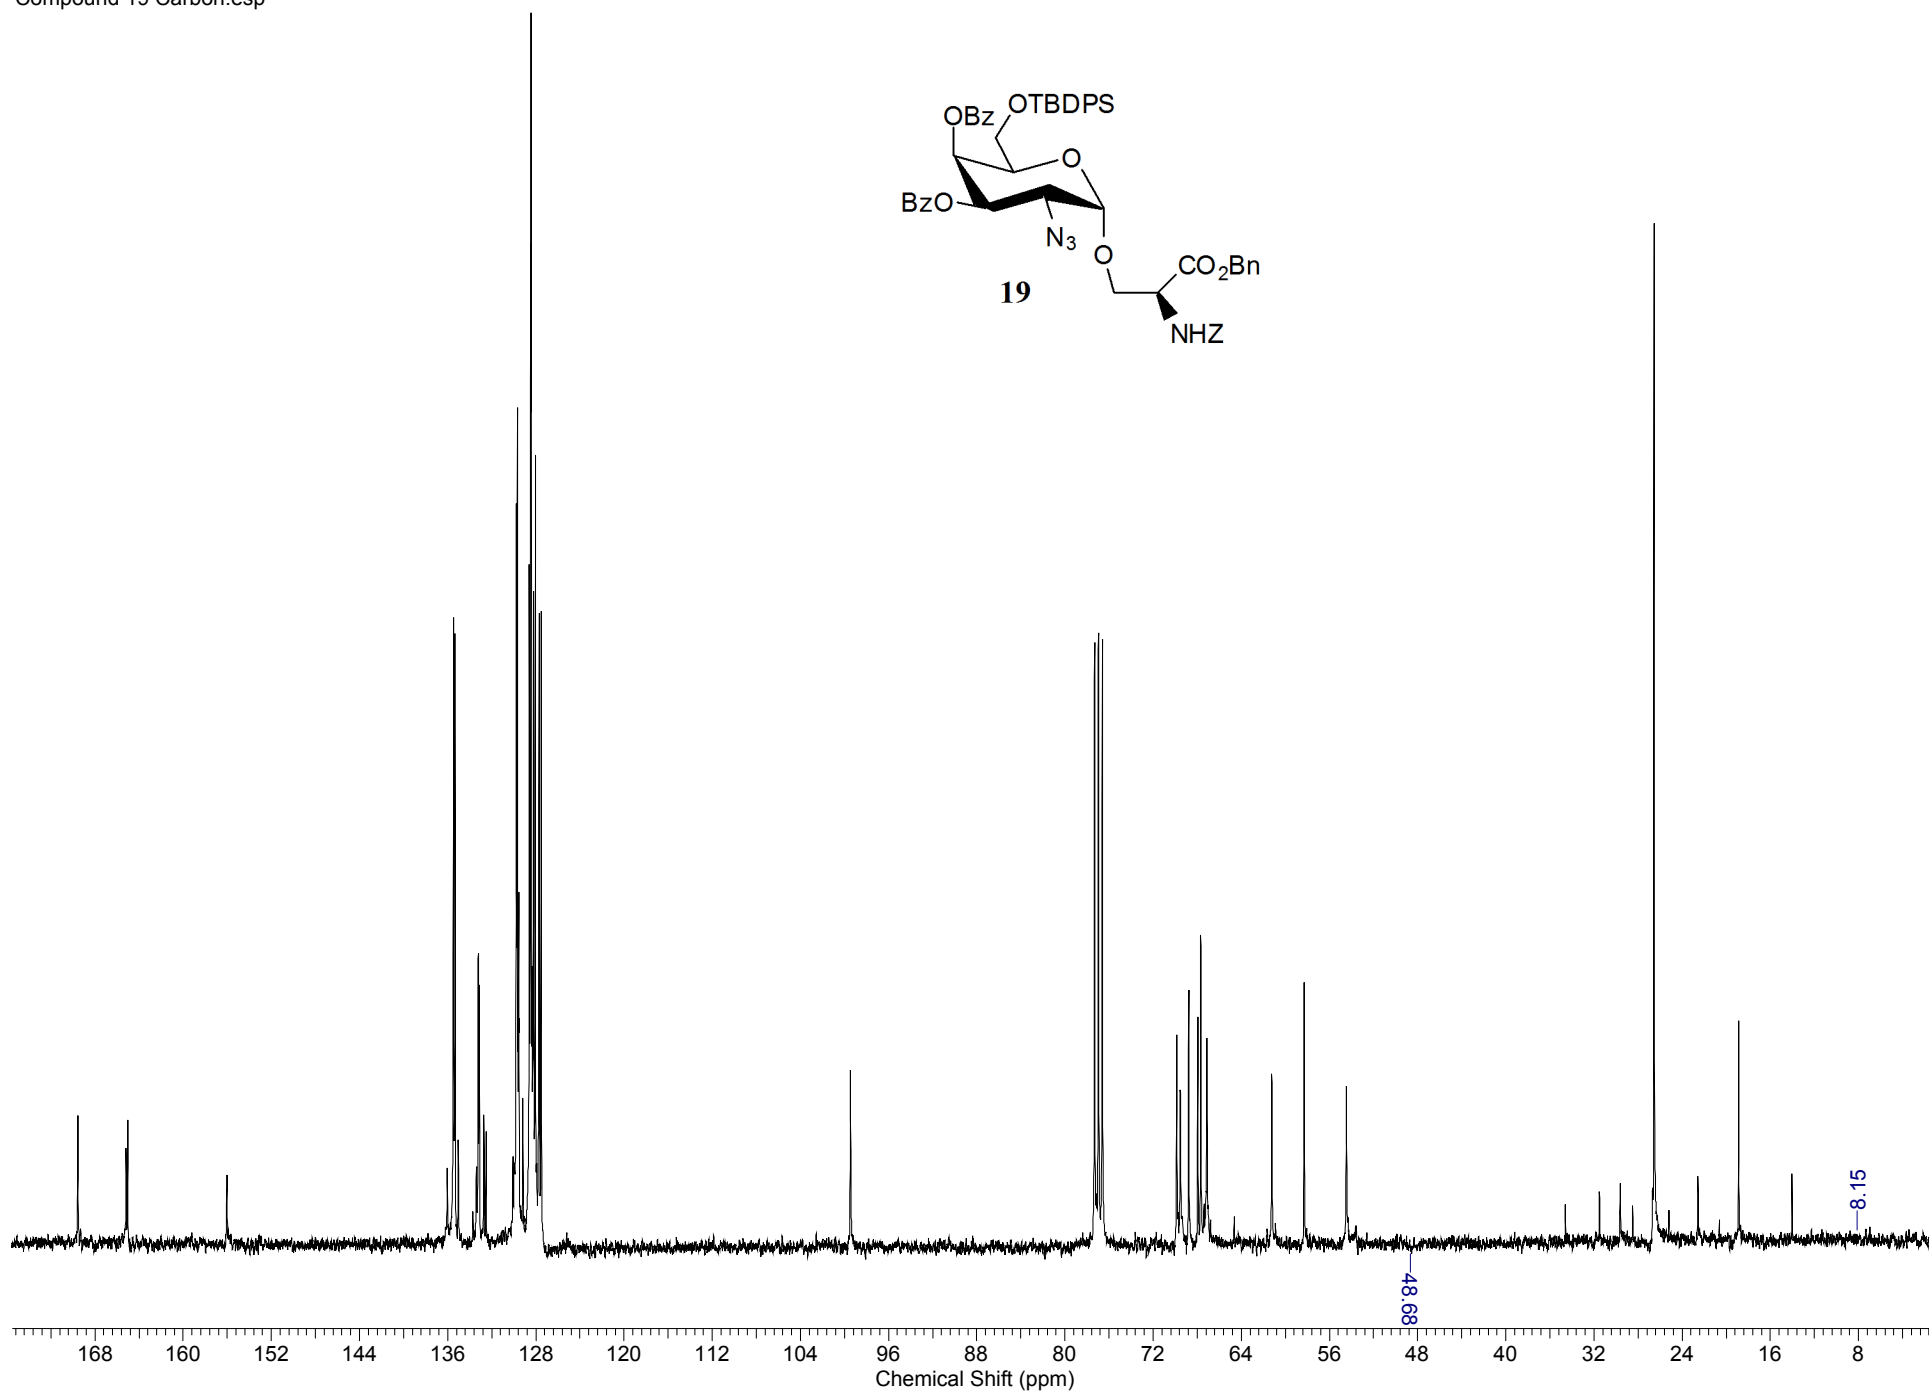

Compound 20 proton.esp

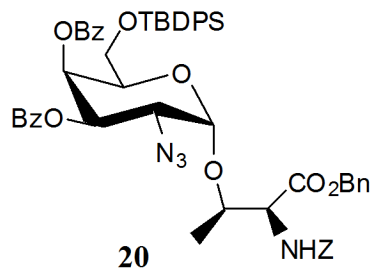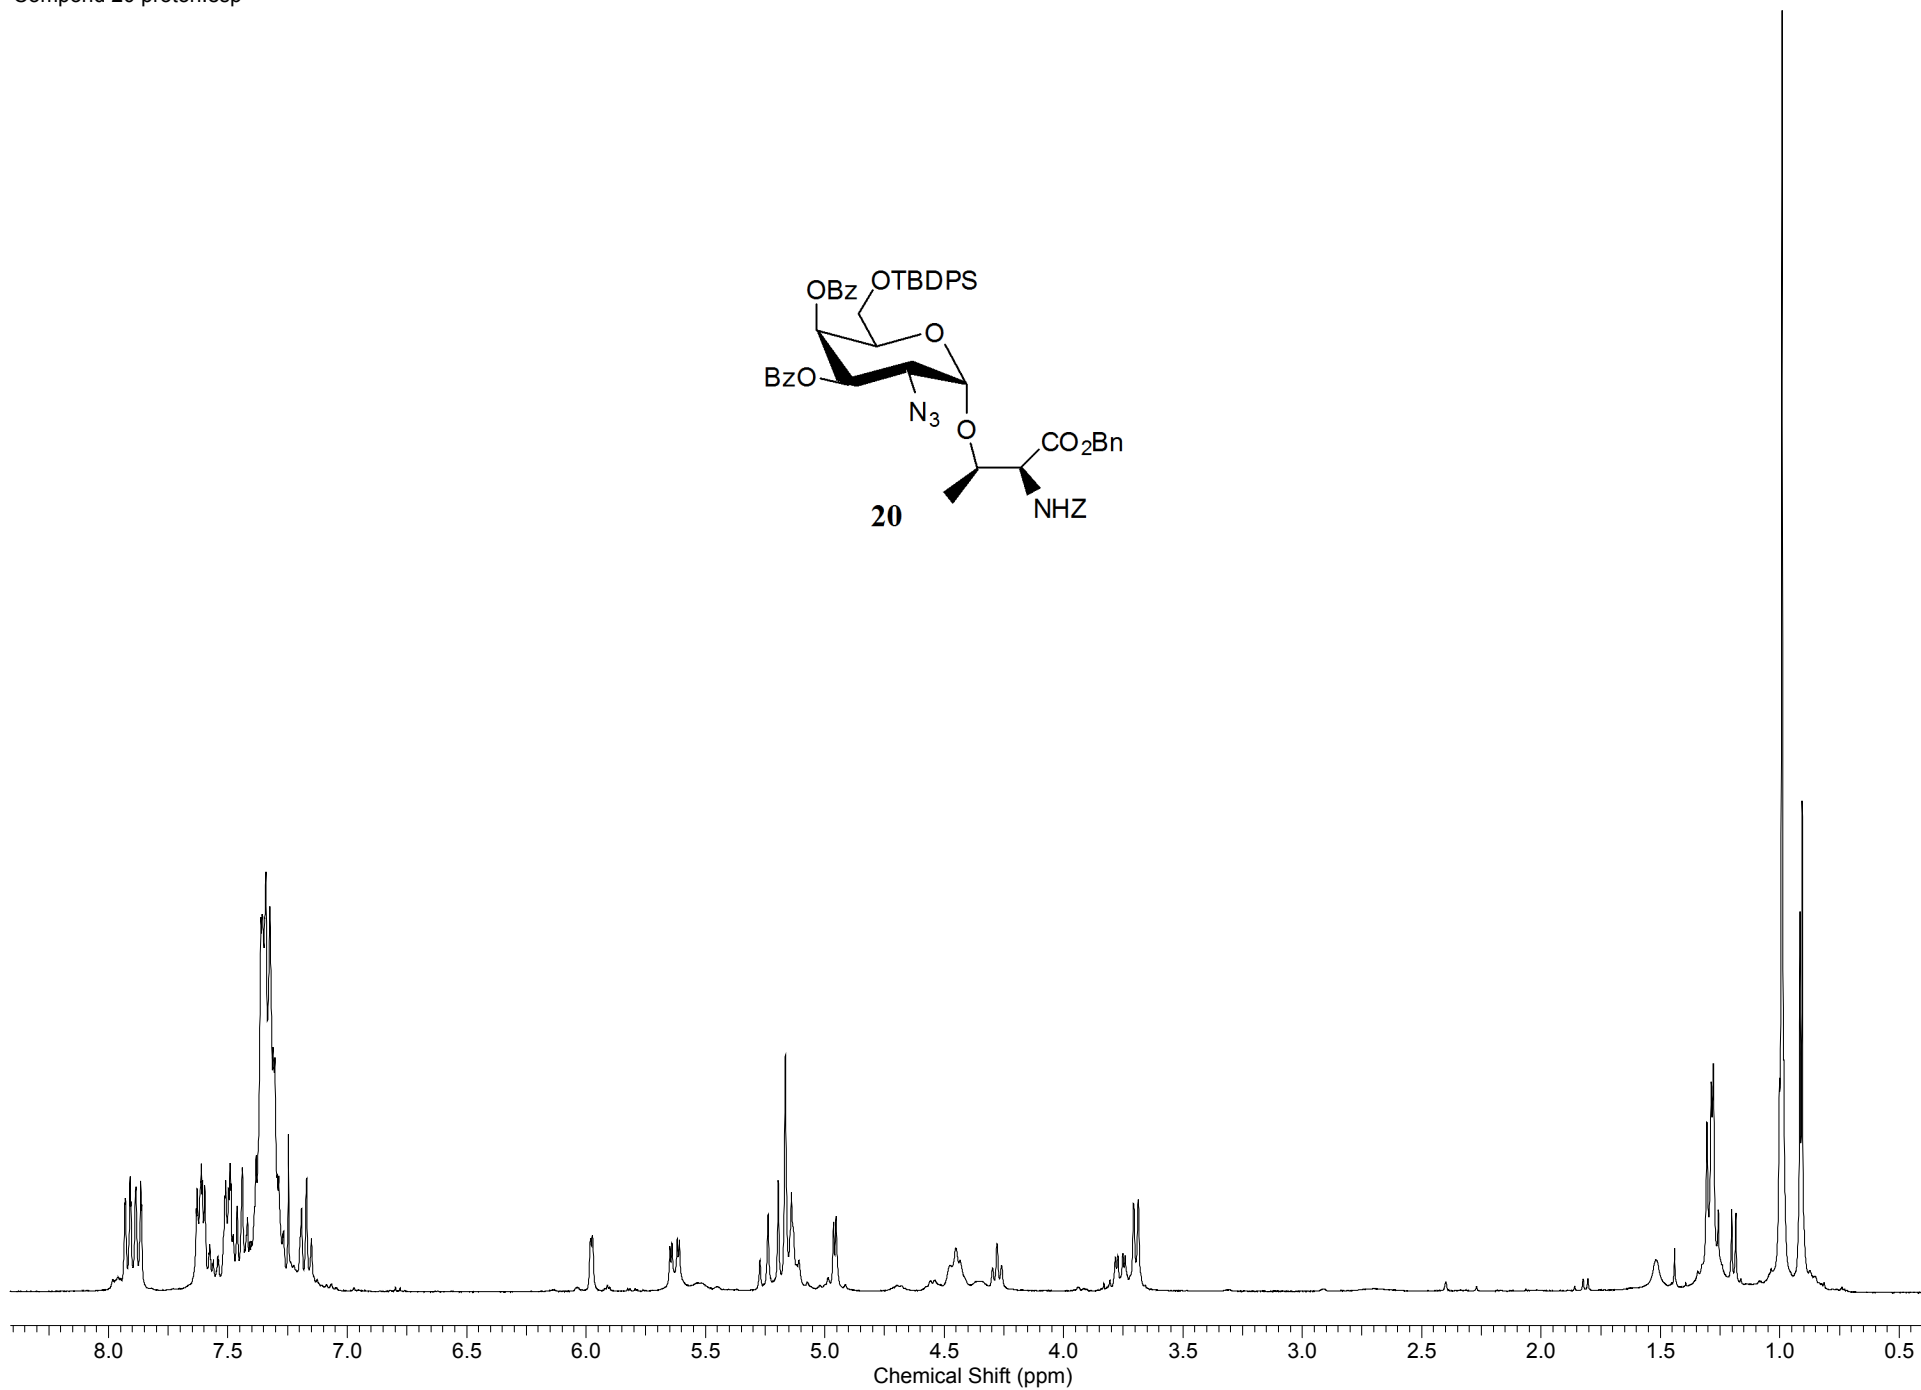

Compound 20 Carbon.esp

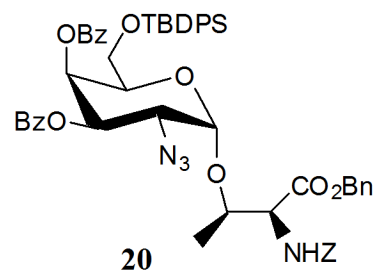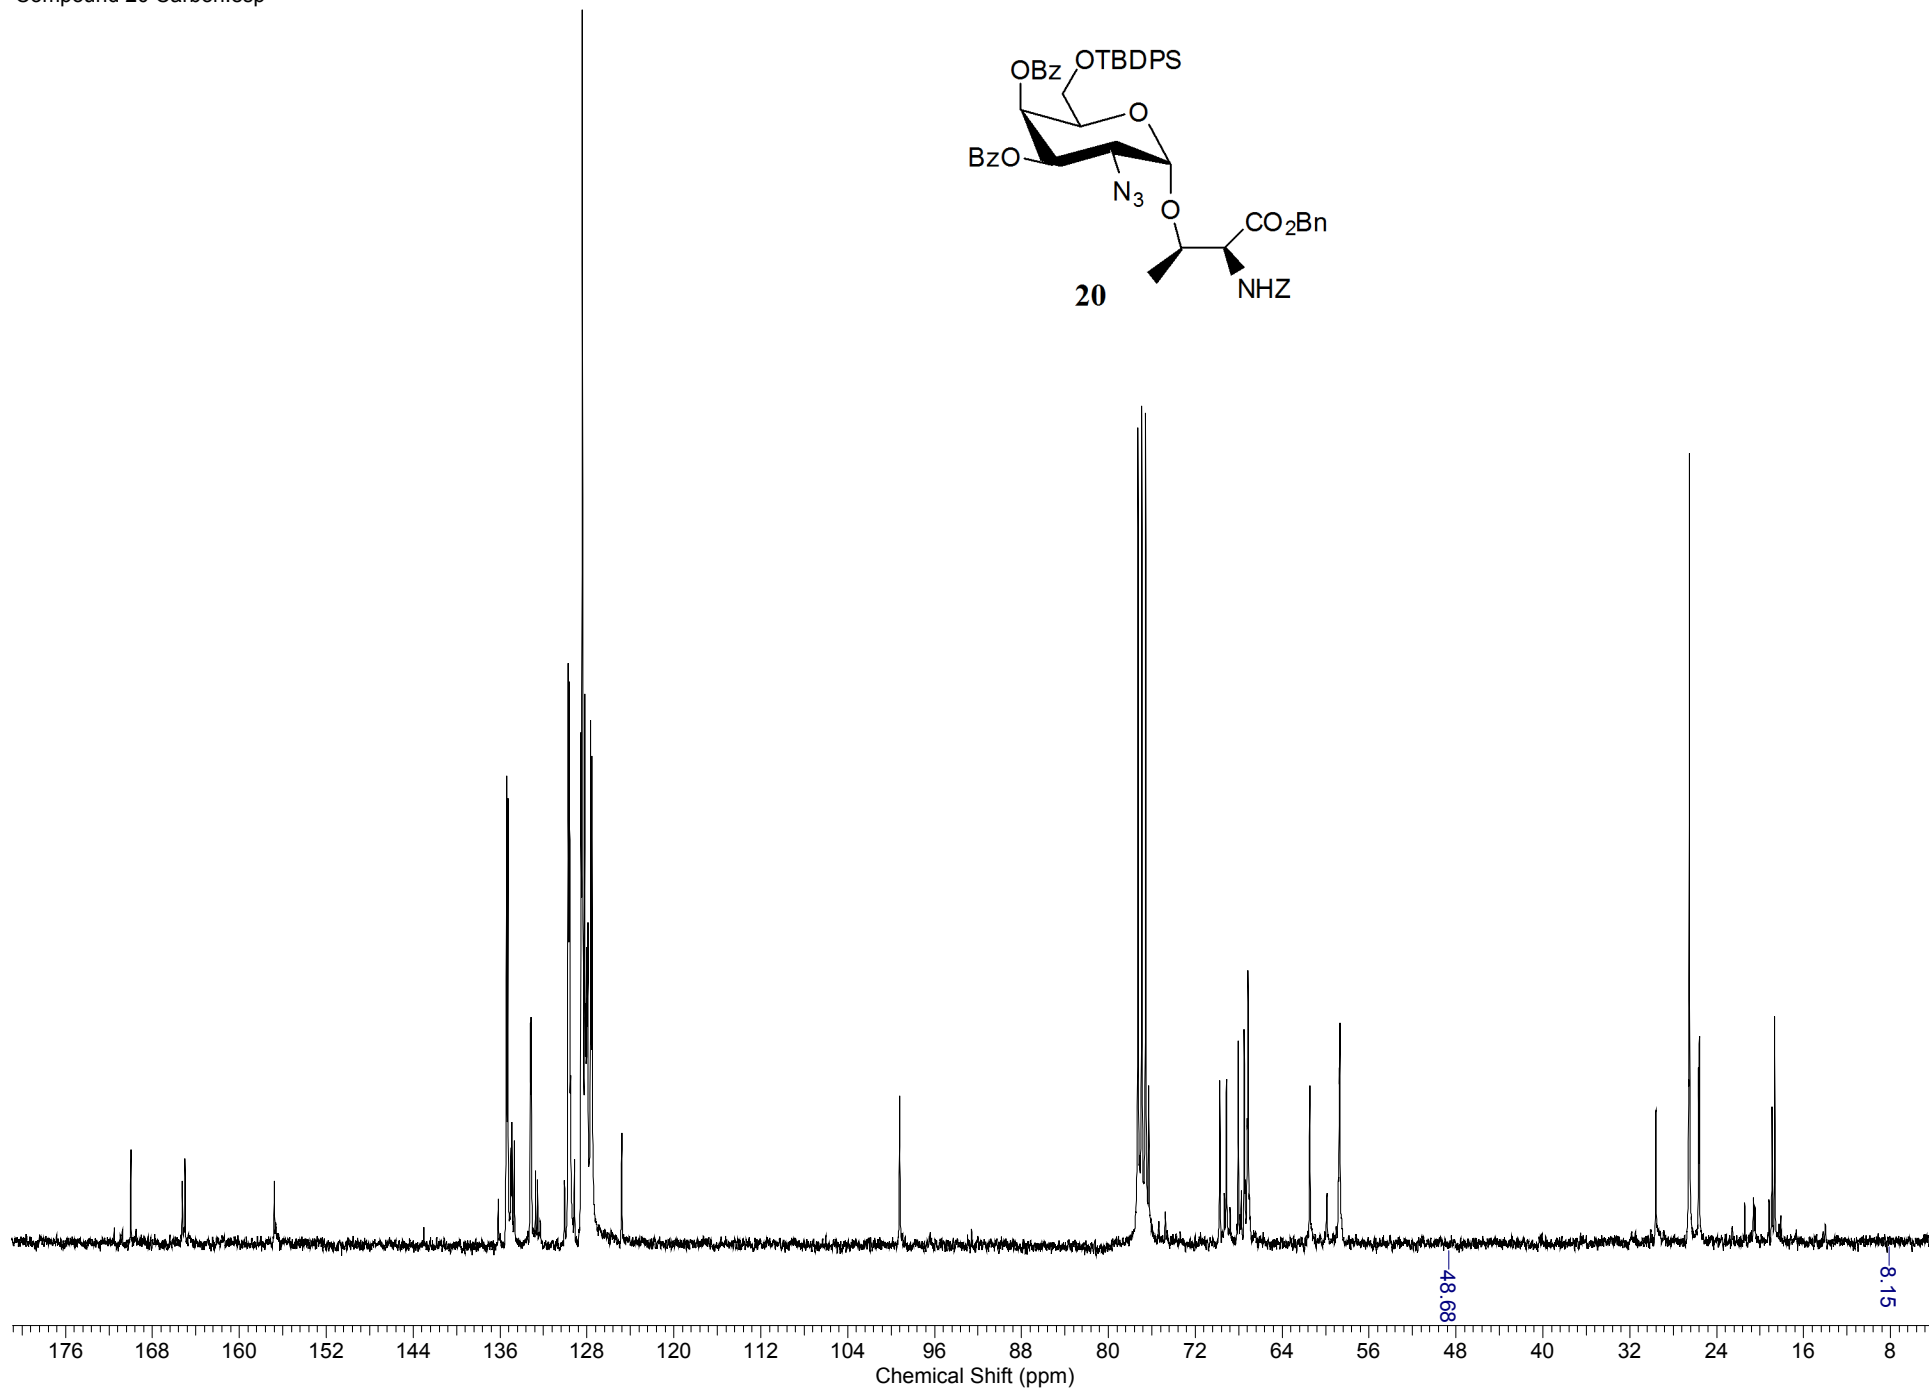

Compound 21 proton.esp

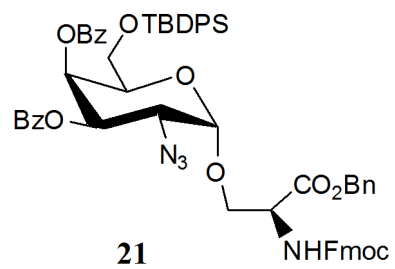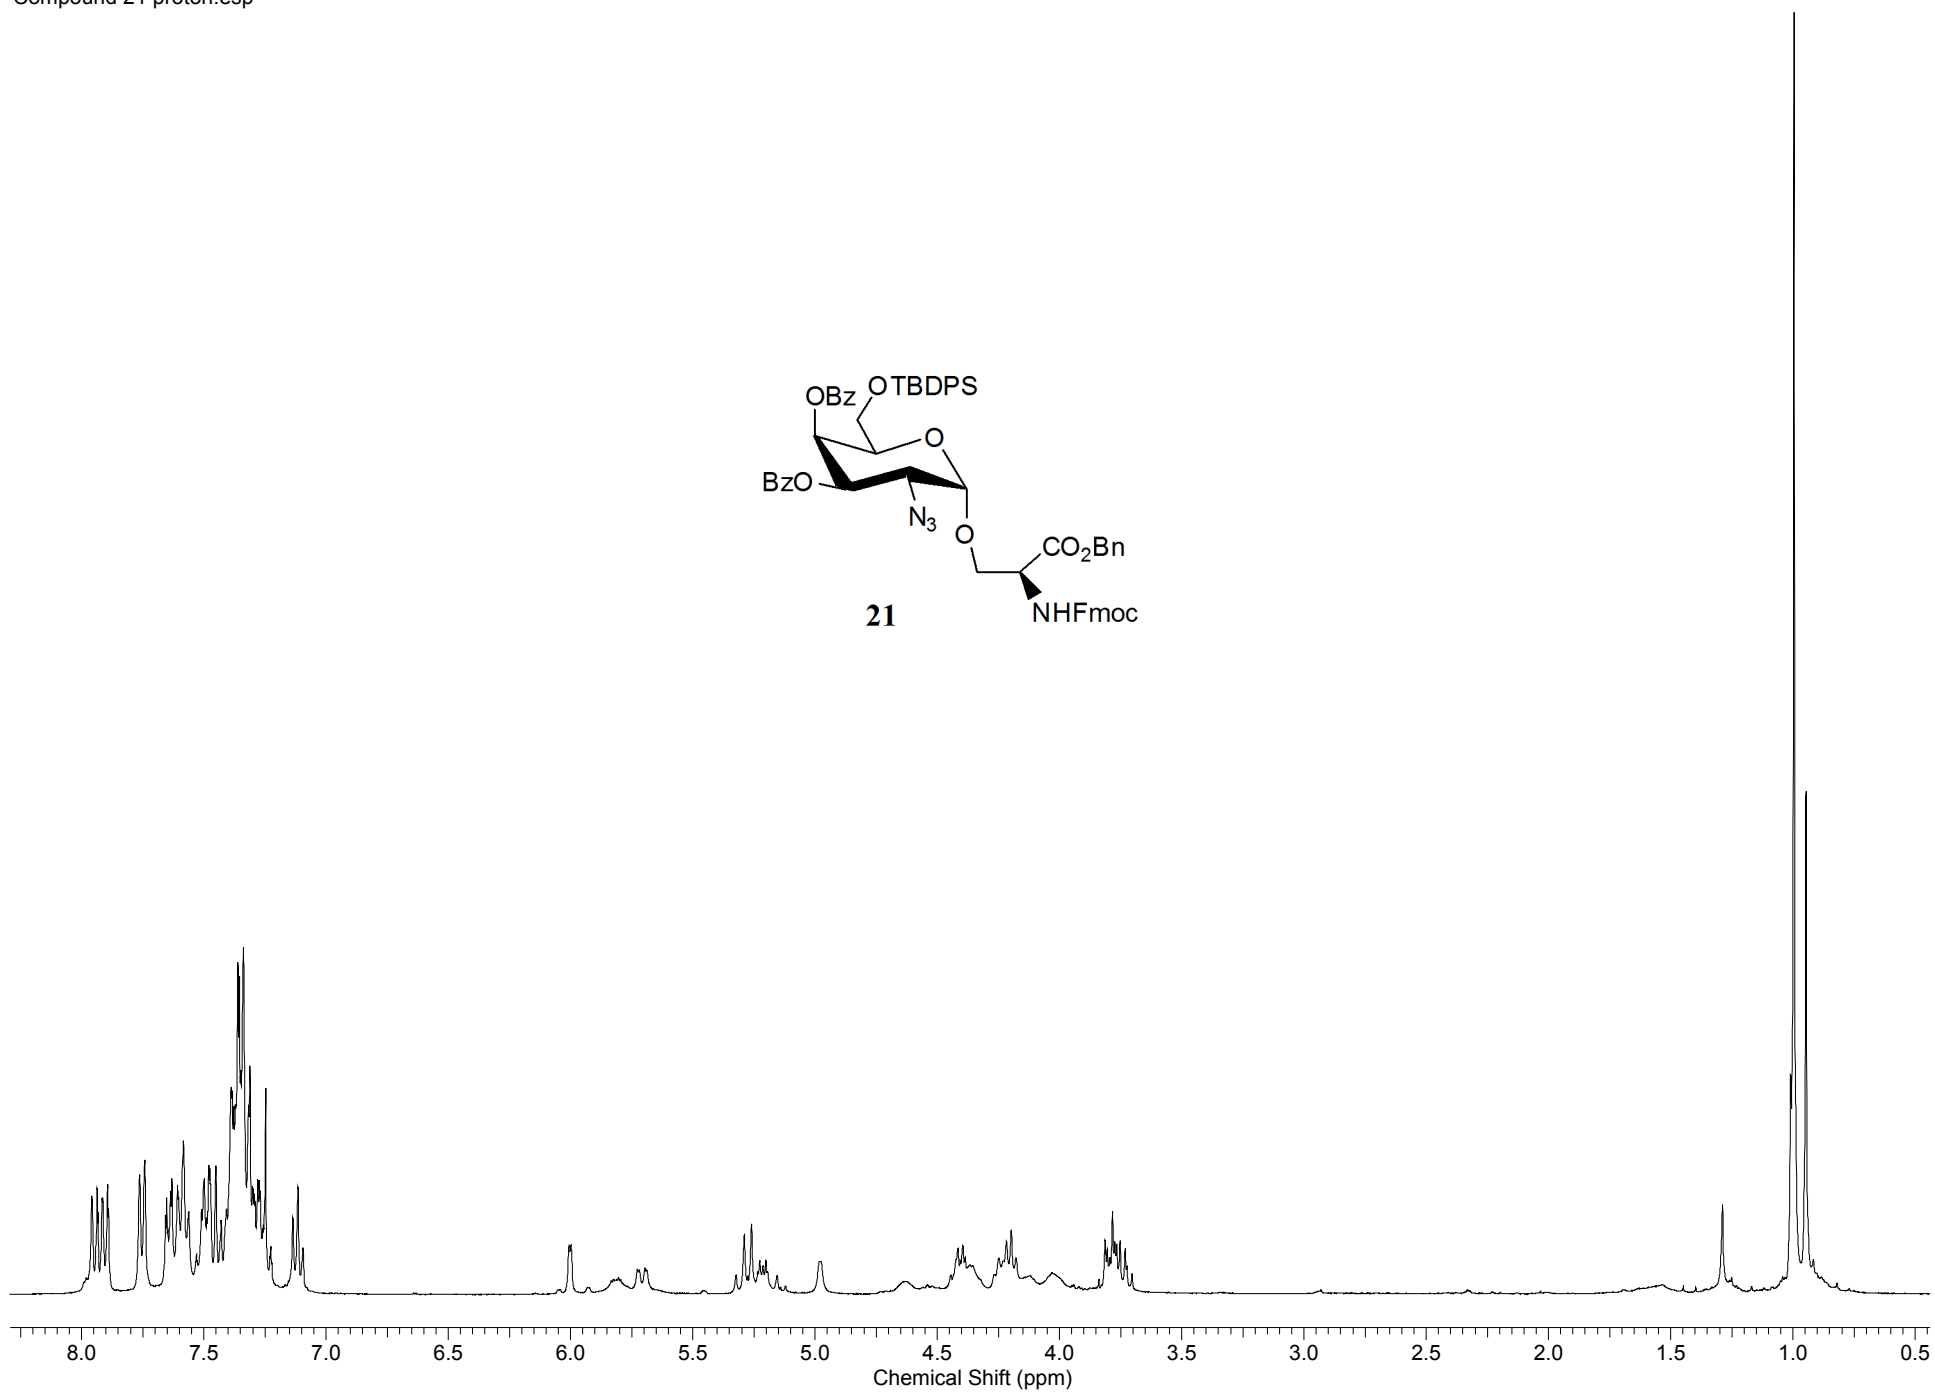

Compound 21 Carbon.esp

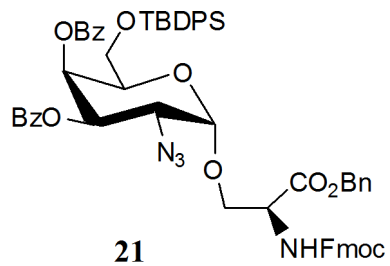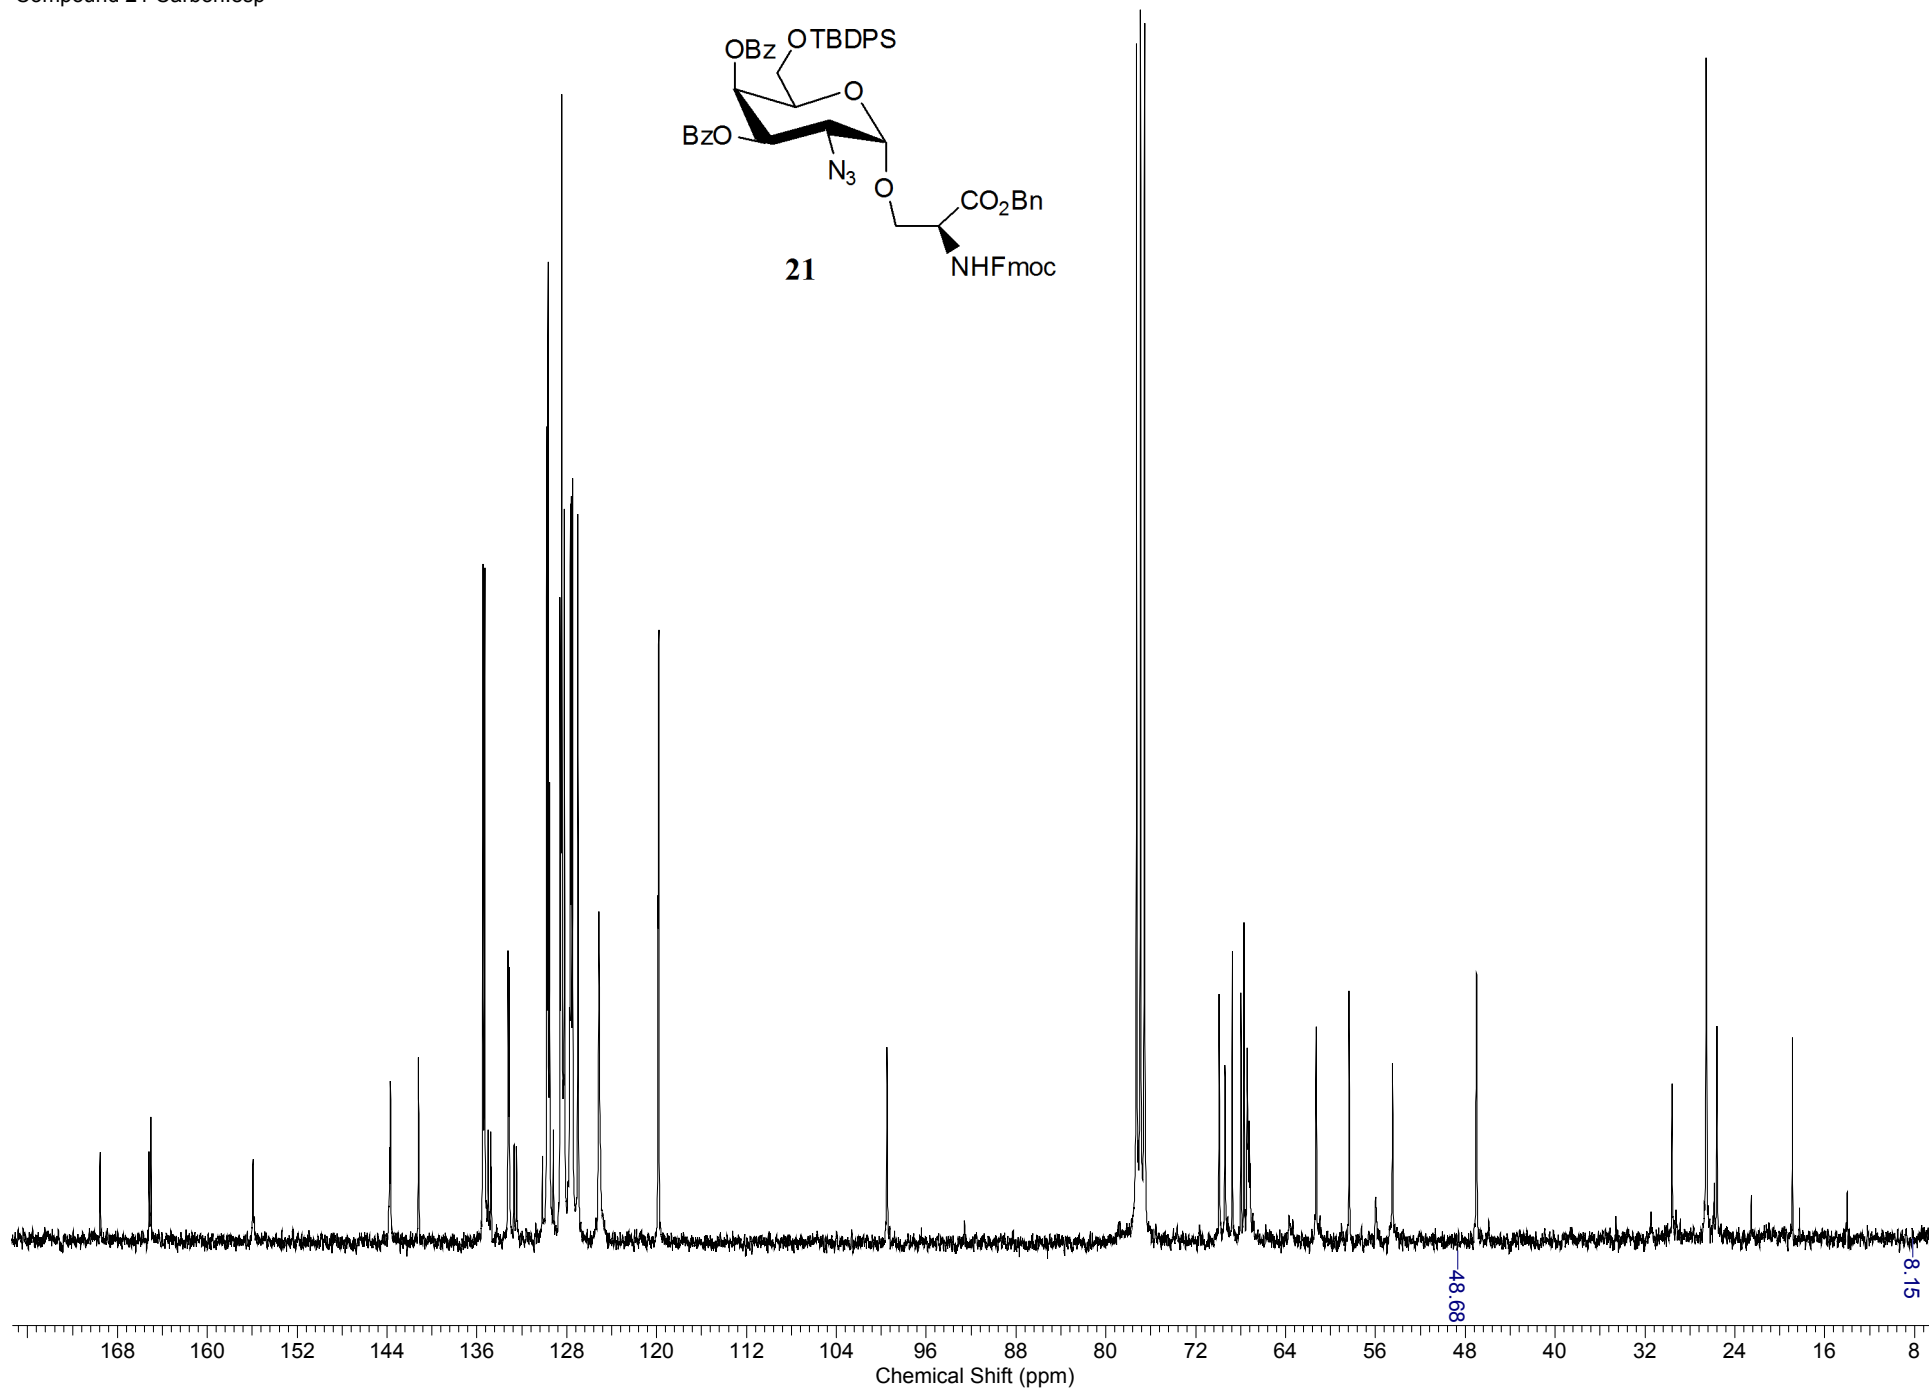



Compound 22 proton.esp

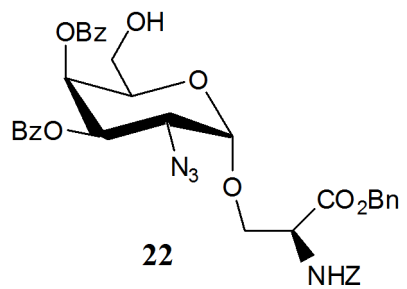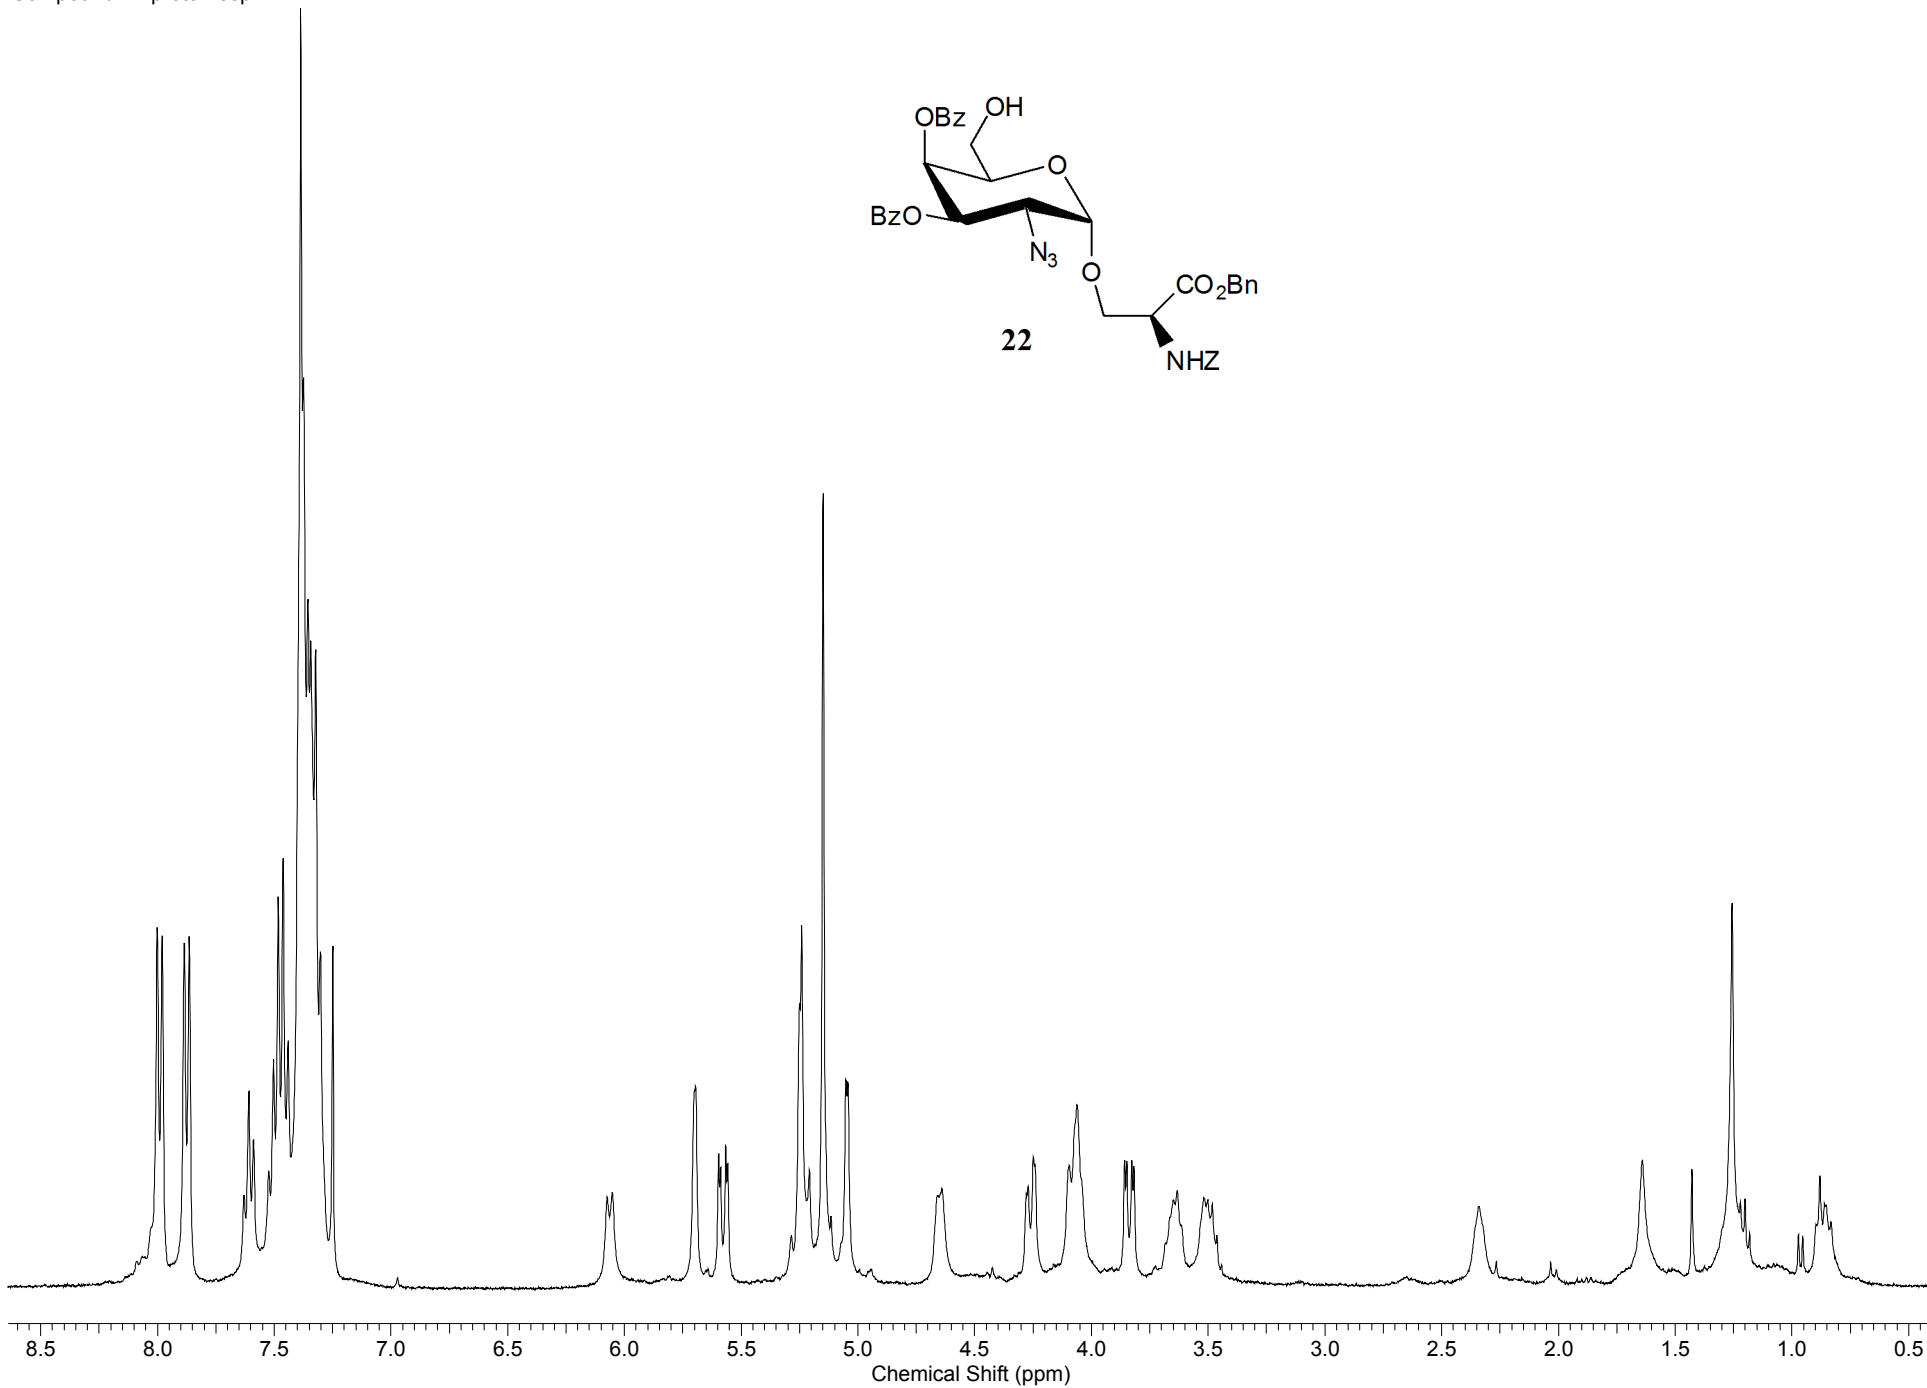

Compound 23 proton.esp

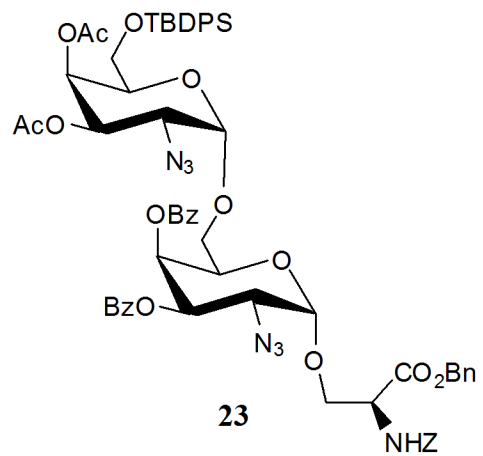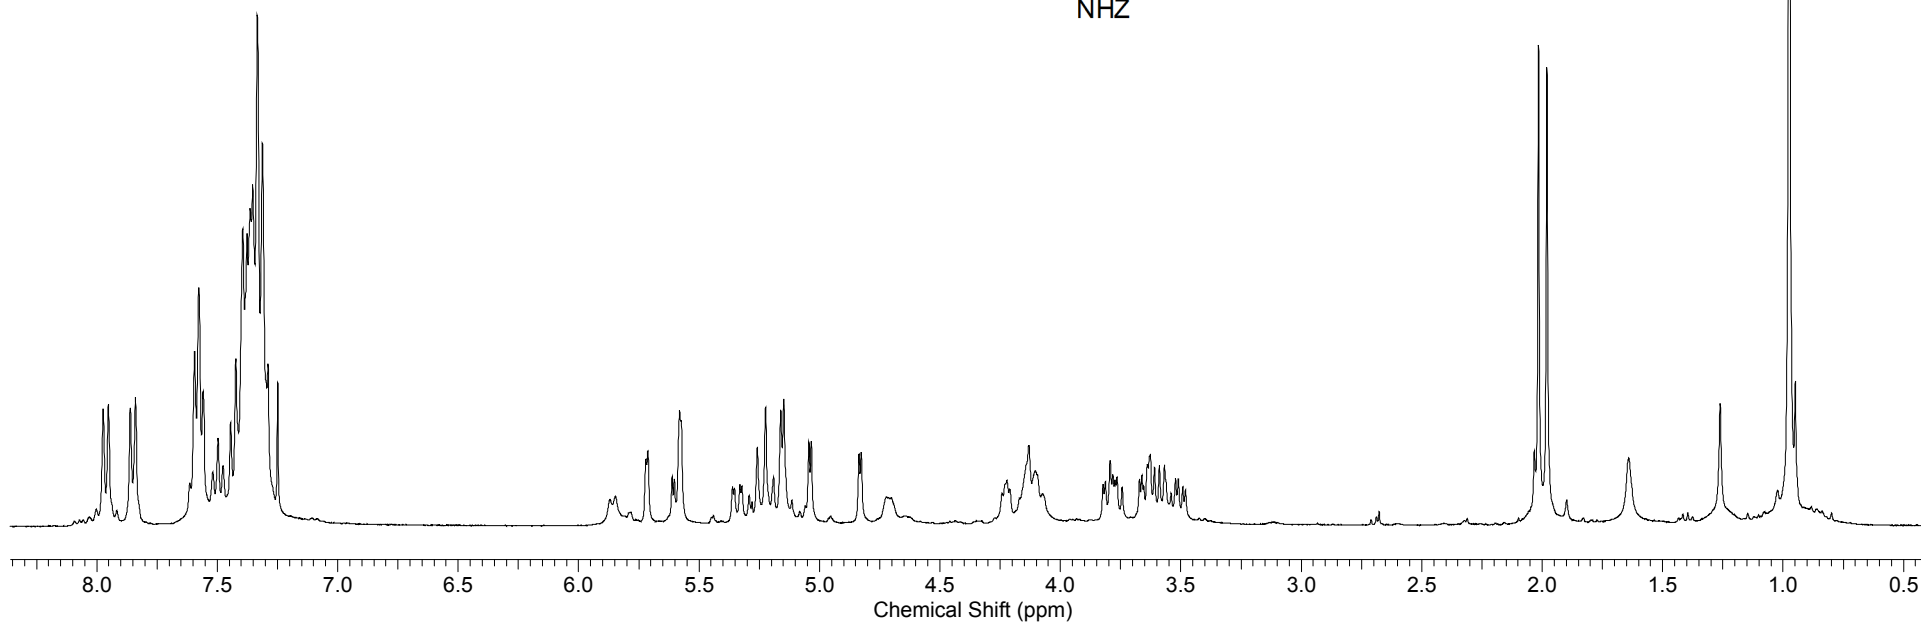

Compound 23 Carbon.esp

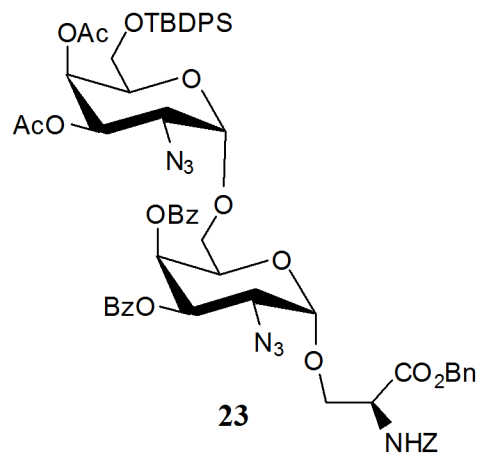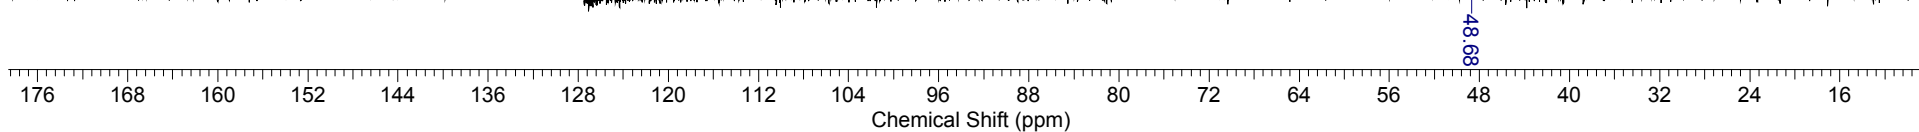

Supplement: c1ob05893b.pdf [file c1ob05893b.pdf]
